## **Gatekeeper helix activates Golgi SM protein Sly1 and directly mediates close-range vesicle tethering**

**M. Duan<sup>1\*</sup>, R.L. Plemel<sup>1\*</sup>, T. Takenaka<sup>1,5</sup>, A. Lin<sup>6</sup>, B.M. Delgado<sup>6</sup>, U.**

**Nattermann<sup>1,3,4</sup>, D.P. Nickerson<sup>6</sup>, J. Mima<sup>7</sup>, E.A. Miller<sup>8</sup>, A.J. Merz<sup>1,2,§</sup>**

Departments of <sup>1</sup>Biochemistry; <sup>2</sup>Physiology & Biophysics; <sup>3</sup>Biophysics, Structure, and Design Graduate Program; and <sup>4</sup>Institute for Protein Design, University of Washington, Seattle, United States, 98195-7350

<sup>5</sup>Tokyo Institute of Technology, Tokyo, Japan

<sup>6</sup>Department of Biology, California State University, San Bernardino, United States

<sup>7</sup>Institute for Protein Research, Osaka University, Osaka, Japan

<sup>8</sup>MRC Laboratory of Molecular Biology, Cambridge, England

\*Equal contributor

§ Corresponding author: merza@uw.edu · +1-206-616-8308

## ABSTRACT (c. 160 words)

The essential Golgi protein Sly1 is a member of the SM (Sec1/mammalian Unc-18) family of SNARE chaperones. Sly1 was originally identified through gain-of-function alleles that bypass requirements for diverse vesicle tethering factors. Employing genetic analyses and chemically defined reconstitutions of ER-Golgi fusion, we discovered that a loop conserved among Sly1 family members is not only autoinhibitory, but also acts as a positive effector. An amphipathic helix within the loop directly binds high-curvature membranes; membrane binding is required for relief of Sly1 autoinhibition and allows Sly1 to directly tether incoming vesicles to the Qa-SNARE on the target organelle. The *SLY1-20* allele bypasses requirements for diverse tethering factors but loses this functionality if Sly1 membrane binding is impaired. We propose that long-range tethers, including Golgins and multisubunit tethering complexes, hand off vesicles to Sly1, which then tethers at close range to activate SNARE assembly and fusion in the early secretory pathway.

## INTRODUCTION

Traffic through the secretory and endocytic systems depends on accurate and timely targeting of transport vesicles to acceptor organelles. The terminal stage of targeting is membrane fusion, catalyzed by the formation of *trans*-SNARE complexes that zipper together, doing the mechanical work of moving two membranes into proximity and driving their merger. Although SNAREs alone can drive fusion and confer some compartmental selectivity, spontaneous SNARE assembly is slow and error-prone. Consequently, an array of tethering factors and SNARE chaperones are indispensable *in vivo* (Baker and Hughson, 2016; Gillingham and Munro, 2019). For example, every SNARE-mediated fusion event that has been closely examined requires a cofactor of the Sec1/mammalian Unc-18 (SM) family.

For decades the mechanisms of SM protein function were enigmatic (Carr and Rizo, 2010; Rizo and Sudhof, 2012; Sudhof and Rothman, 2009) but biochemical work, structural studies, and single-molecule force spectroscopy suggest that SM proteins are assembly chaperones for *trans*-SNARE complex formation, and that SMs act, at least in part, by

templating the initial SNARE zippering reaction (Baker et al., 2015; Jiao et al., 2018) and by  
30 protecting appropriately formed prefusion complexes from kinetic proofreading by the SNARE  
disassembly proteins Sec17/ $\alpha$ -SNAP and Sec18/NSF (Lobingier et al., 2014; Ma et al., 2013;  
Schwartz et al., 2017; Xu et al., 2010). There are four subfamilies of SM proteins. The budding  
yeast *Saccharomyces cerevisiae* has one representative of each. Vps33, the first SM identified  
genetically, controls fusion at late endosomes and lysosomes (Banta et al., 1990; Patterson,  
35 1932; Sevrioukov et al., 1999). Vps45 controls fusion at early endosomal compartments  
(Cowles et al., 1994; Piper et al., 1994). Sec1 and its orthologs (Unc-18/Munc-18) control  
exocytosis (Grote et al., 2000; Novick et al., 1979; Verhage et al., 2000; Wu et al., 1998). Finally,  
fusion at the Golgi, and probably at the endoplasmic reticulum (ER), is controlled by Sly1 (Li et  
40 al., 2005; Lupashin et al., 1996; Ossig et al., 1991; Peng and Gallwitz, 2002; Sogaard et al.,  
1994).

The genetics of *SLY1* are complex and revealing. Ypt1 (yeast Rab1) is an essential  
regulator of docking and fusion at the Golgi. *SLY1* was originally identified through an allele,  
*SLY1-20*, that dominantly Suppresses the Lethality of Ypt1 deficiency (Dascher et al., 1991;  
Ossig et al., 1991; Ossig et al., 1995). Subsequent work by several groups showed that *SLY1-20*  
45 suppresses deficiencies not only of Ypt1, but of numerous other factors that promote ER and  
Golgi traffic. These include the Dsl complex (*dsl1* was originally identified through its genetic  
interaction with *SLY1-20*; Reilly et al., 2001; Vanrheenen et al., 2001); the COG complex (*cog2*,  
*cog3*; VanRheenen et al., 1998; VanRheenen et al., 1999); the TRAPP complexes (*bet3-1*; Sacher  
et al., 1998); the Golgin coiled-coil tether Uso1 (yeast p115; Sapperstein et al., 1996); Ypt6  
50 (yeast Rab6) and its nucleotide exchange complex (*ric1*; Bensen et al., 2001; Li et al., 2007);  
and the Ypt6 effector complex GARP (*vps53*; Vanrheenen et al., 2001). In addition, *SLY1-20*  
suppresses partial deficiencies of Golgi SNAREs (*sec22*; Ossig et al., 1991); COPI coat subunits  
*sec21*; (Ossig et al., 1991); and the COPI Arf GAP Glo3 (Vanrheenen et al., 2001).

*SLY1-20* and the similar allele *SLY1-15* encode missense substitutions at adjacent  
55 positions within a loop insertion that is evolutionarily conserved among Sly1 subfamily  
members, but absent from the other three SM subfamilies (Dascher et al., 1991; Li et al., 2007).  
On this basis it was hypothesized that the Sly1 loop is auto-inhibitory, and that *SLY1-20* and  
related alleles gain function by releasing the loop from its closed, autoinhibitory state

(Bracher and Weissenhorn, 2002; Li et al., 2007). This proposal was strengthened by the  
60 discovery that the Sly1 loop occludes a conserved site which, in the lysosomal SM Vps33,  
binds R/v-SNAREs with high affinity (Baker et al., 2015).

The physiological mechanism by which the Sly1 loop's putative auto-inhibitory  
activity is released to promote SNARE complex formation is unknown, but was suggested to  
require Ypt1, the yeast Rab1 ortholog (Bracher and Weissenhorn, 2002; Li et al., 2007). Here,  
65 we show that the loop's inhibitory activity is released when an amphipathic helix within the  
loop interacts directly with the incoming vesicle membrane's lipid bilayer. Moreover, the loop  
allows Sly1 to directly tether incoming vesicles: the Sly1 N-lobe is anchored to the Qa/t-SNARE  
on the target organelle, while the Sly1 regulatory loop binds the vesicle lipid bilayer. We  
propose that this membrane binding steers Sly1 into an orientation optimal for productive  
70 R/v-SNARE association and *trans*-complex assembly. This schema explains how Sly1-20 can  
bypass the otherwise essential functions of so many different Golgi tethering factors, and  
suggests that the Sly1 regulatory loop links Sly1 activation, the capture of transport vesicles  
addressed to organelles of the early secretory pathway, and productive *trans*-SNARE complex  
assembly.

75

## RESULTS

### New *SLY1* alleles define a regulatory loop in Sly1

We thought it likely that early screens which identified *SLY1*\* bypass alleles were not saturated, and that a more focused screen might yield additional informative alleles. *Uso1* is a Golgin-class tether that is a direct effector of Ypt1/Rab1. Loss of *Uso1* is lethal, and this lethality is suppressed by *SLY1-20* (Ballew et al., 2005; Sapperstein et al., 1996). We therefore designed a selection for dominant *SLY1*\* alleles that could suppress the loss of *USO1* (**Fig. 1A**). (In this report, sets of *SLY1* alleles and their products are referred to collectively as *SLY1*\* and Sly1\*.) Our screen retrieved many *SLY1*\* alleles, most carrying multiple missense substitutions. From these, individual missense substitutions were re-introduced into wild type *SLY1* and tested for their ability to suppress deficiencies of *Uso1* or Ypt1 (**Fig. 1B**; **Supplementary Table 1**). Importantly, our screen retrieved the original *SLY1-20* and *SLY1-15* alleles. We also identified suppressing substitutions at nearby sites on helix  $\alpha$ 20, and on the short segment linking helices  $\alpha$ 20 and  $\alpha$ 21. Additionally, we identified suppressing substitutions at the base of the Sly1-specific loop, and at positions cradling the base of the

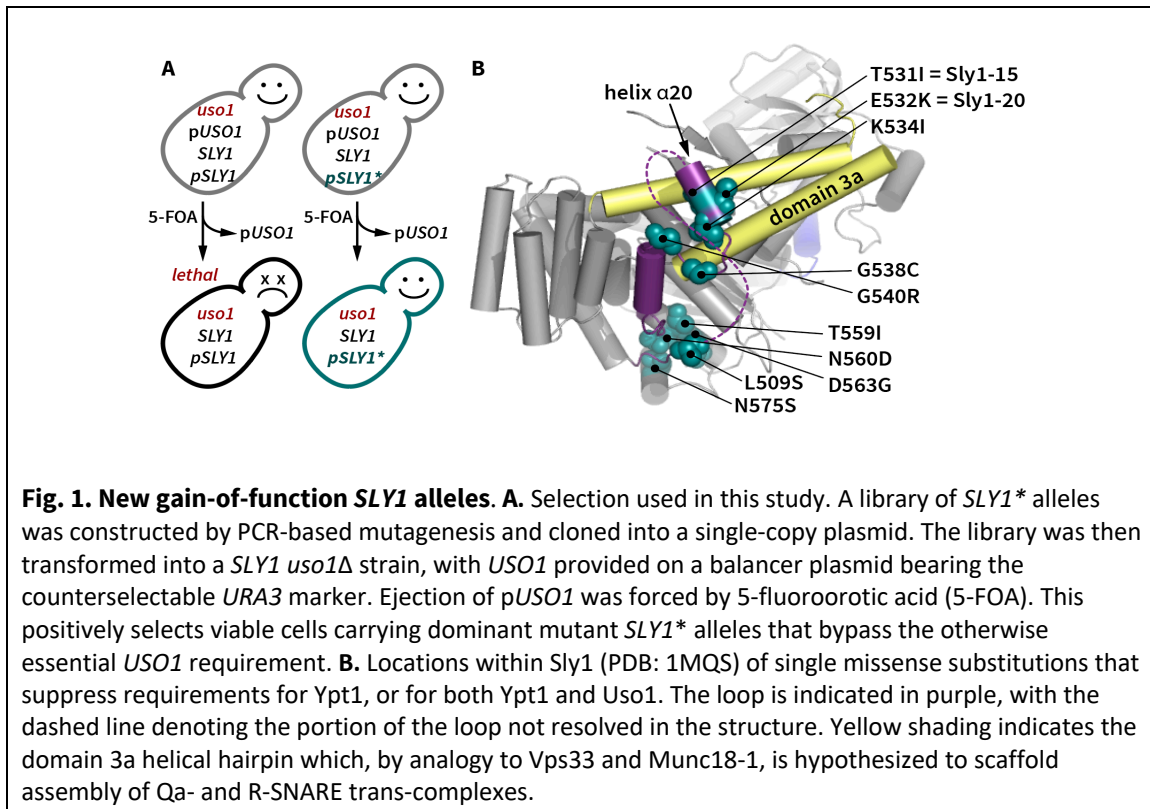

loop, but non-adjacent within the linear polypeptide sequence. One of these was T559I. A genomic survey for gene pairs exhibiting spontaneous suppressing interactions found that a substitution at the same position, T559K, dominantly suppressed deficiencies of both the GARP subunit Vps53 and the Arf GAP Glo3 (van Leeuwen et al., 2016). Most of the gain-of-  
95 function single substitutions that we tested suppressed *ypt1-3* but, in contrast to the multi-site mutants obtained in the initial selection for *uso1Δ* bypass, were unable to suppress *uso1Δ*. (**Supplementary Fig. S1; Supplementary Table 1**). Thus, strong Sly1 gain-of-function phenotypes can arise through individual substitutions or through the compounded effects of multiple weak driver substitutions. These results show that earlier screens were not, as had  
100 been suggested, saturated (Li et al., 2007).

As noted by Baker and coworkers (2015), helices  $\alpha 20$  and  $\alpha 21$  sit atop two conserved regions that in Vps33 are of special importance for SNARE binding: domain 3a, which serves as a scaffold to nucleate the parallel, in-register assembly of the Qa- and R-SNAREs, and an aromatic pocket that serves as a high-affinity anchoring point for the R-SNARE  
105 juxtamembrane linker. On the basis of the Vps33 structures and the original *SLY1-20* and *SLY1-15* alleles, Baker *et al.* (2015) speculated that when closed, the Sly1 loop might prevent R-SNARE binding to Sly1. The dominant suppressors obtained in our screen and data presented below reinforce and extend that model.

### 110 **Sly1 bypass suppressors are hyperactive in a minimal fusion system**

*In vivo* genetic tests and crude *in vitro* transport systems (Baker et al., 1988; Ballew et al., 2005; Ruohola et al., 1988) cannot tell us whether Sly1\* mutants must interact with additional proteins beyond the core SNARE fusion machinery to manifest gain of function. To overcome this limitation, we developed a chemically defined reconstituted proteoliposome (RPL)  
115 system to monitor fusion driven by ER-Golgi SNAREs (**Fig. 2A**). This system, adapted from an assay developed to study homotypic vacuole fusion (Zucchi and Zick, 2011), employs two orthogonal pairs of Förster resonance energy transfer (FRET) probes, to simultaneously monitor both lipid and content mixing in small (20  $\mu$ L) reaction volumes. Although we present

only content mixing data in this manuscript, the lipid mixing signal provides an intrinsic control, allowing us to detect partial hemifusion or fusion that is accompanied by lysis.

120

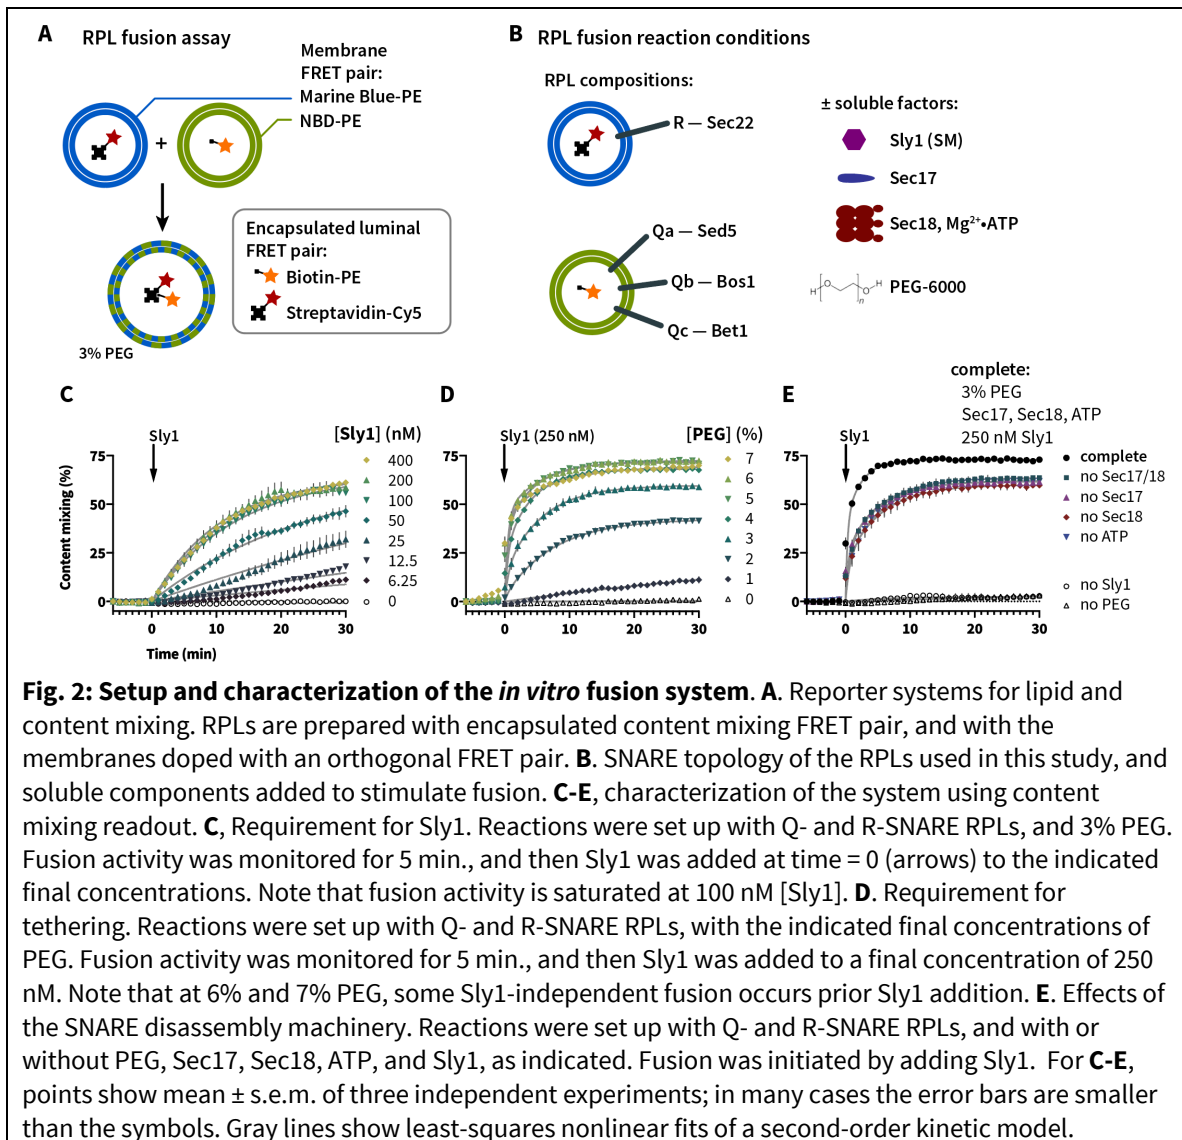

125

130

135

In previous work SMs were shown to stimulate SNARE-mediated lipid mixing, but only in the presence of tethering factors or molecular crowding agents that substitute for tethering factors (Furukawa and Mima, 2014; Yu et al., 2015). Consistent with these previous studies, content mixing in heterotypic reactions between RPLs bearing the R-SNARE Sec22, and RPLs bearing the Q-SNAREs Sed5, Bos1 and Bet1, was strongly stimulated only when both Sly1 and a crowding agent (polyethylene glycol 6000; PEG) were provided (**Fig. 2C,D**). Under these experimental conditions the stimulatory effect of Sly1 saturated at 100 nM. Two other studies

140

have reported *in vitro* stimulation of fusion by Sly1, though at a 45× higher concentration of Sly1 than the 100 nM used in most of our experiments (Furukawa and Mima, 2014; Jun and Wickner, 2019). Pre-incubation of the RPLs with Mg<sup>2+</sup>-ATP and the SNARE disassembly chaperones Sec17 and Sec18 (yeast α-SNAP and NSF) resulted in immediate and almost complete fusion upon Sly1 addition (**Fig. 2E**), likely indicating that SNAREs on the RPLs equilibrate between productive and refractory configurations, and that Sec17/18-mediated disassembly shifts this equilibrium toward productive, Sly1-reactive configurations.

Next, we compared the activity of wild type Sly1 to three bypass suppressors: Sly1-20 and two of the new alleles identified in our screen. Each variant was tested in reactions containing 3% or 0% polyethylene glycol-6000 (PEG). At 3% PEG all four Sly1 variants drove fusion with similar efficiency (**Fig. 3A**). In marked contrast, at 0% PEG (**Fig. 3B**) all three Sly1 suppressor mutants drove fusion substantially more efficiently than the wild type. In reactions containing Sec17, Sec18, and Mg<sup>2+</sup>-ATP (**Fig. 3C,D**) the same overall pattern emerged. As PEG bypasses requirements for tethering factors and potentiates SM-mediated fusion, our results show for the first time that these Sly1 gain-of-function mutants are intrinsically hyperactive, requiring only SNAREs (or SNAREs and disassembly chaperones) to stimulate fusion, and not additional cellular factors such as Rabs or tethering factors. These results directly mirror the *in vivo* genetic suppression patterns observed for *SLY1-20* and otherwise essential vesicle tethering regulators and effectors.



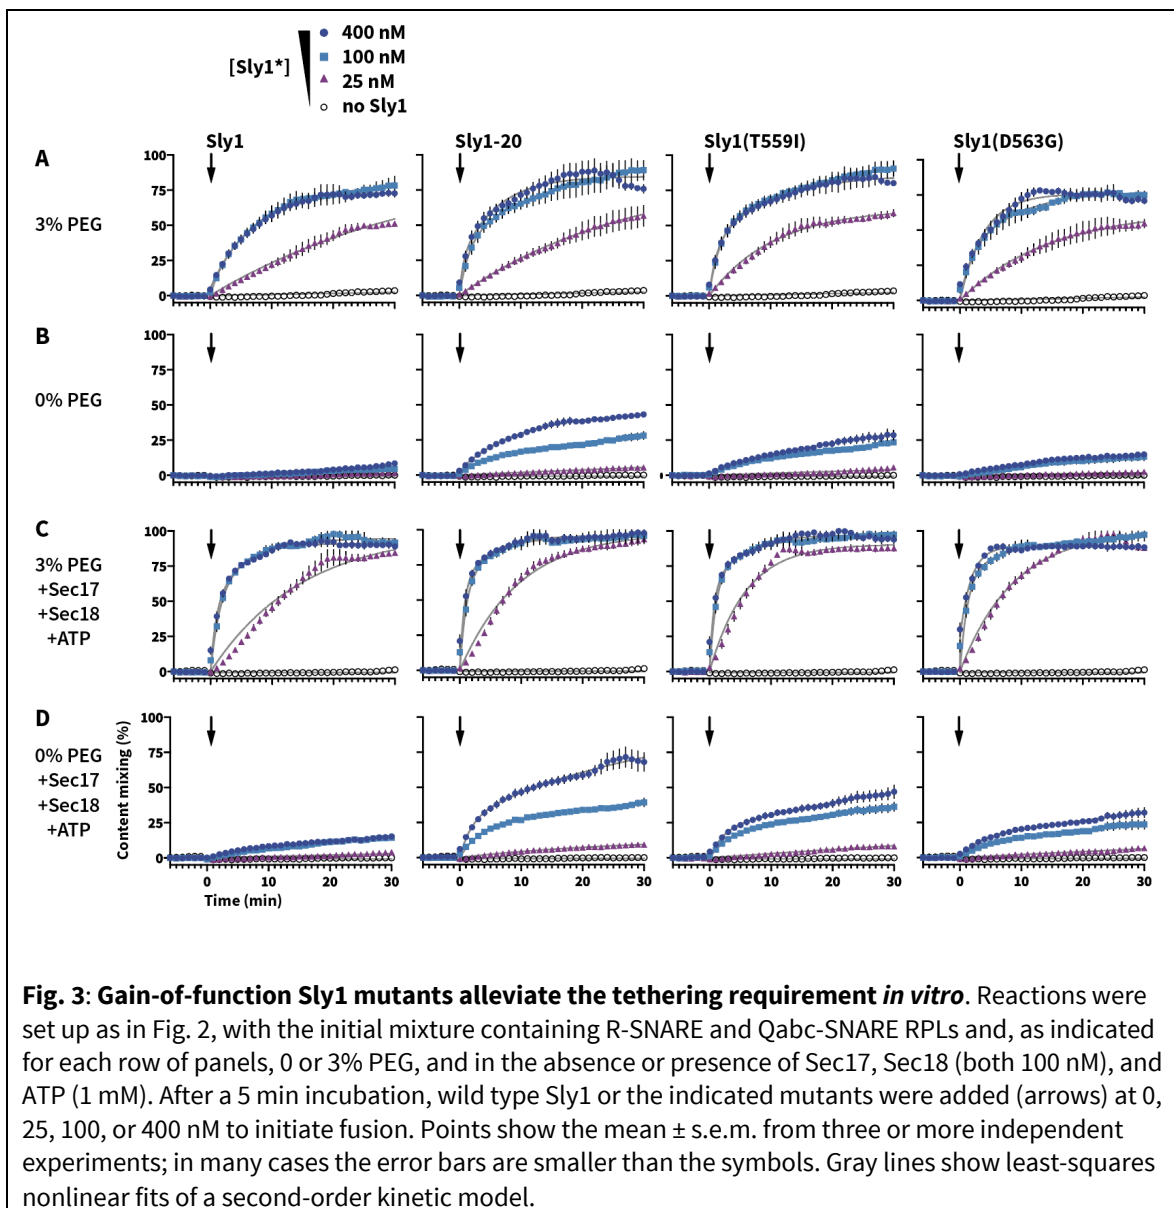

165

170

## The Sly1 regulatory loop has positive as well as negative functions

If the Sly1 loop is autoinhibitory, we might predict that excision of the entire loop should hyperactivate Sly1 as much as or more than the suppressing mutations characterized above. To test this hypothesis, we used the *ROSETTA* software environment (Leaver-Fay et al., 2011) to design a set of Sly1 variants in which the loop is replaced by short peptide linkers (**Fig. 4A; Supplementary Table 2**). Surprisingly, each of the “loopless” *sly1* mutants tested *in vivo* exhibited recessive lethality or slow growth in the presence of the counterselection agent 5-FOA at 30° C; temperature sensitivity; and an inability to bypass deficiencies in *YPT1* or *USO1*. One mutant, *sly1-0\_2*, exhibited somewhat more robust growth compared to the other alleles when present as the sole copy of *SLY1*. *sly1-0\_2* was therefore called *sly1Δloop* and subjected to further scrutiny.

To gain genome-scale insight into the *sly1Δloop* allele’s loss of function, we used synthetic genome array (SGA) analysis. SGA measures the synthetic sickness or rescue (suppression) of a query allele versus a genome-scale collection of loss-of-function alleles (Tong and Boone, 2005). *sly1Δloop* was knocked in at the genomic *SLY1* locus. The resulting strain grew normally on rich YPD medium containing 5-FOA at 30° C, but slowly compared to strains with wild-type or hyperactive *SLY1* alleles at 37° C (**Fig. 4B**). When subjected to SGA analysis, *sly1Δloop* had a synthetic-sick or synthetic-lethal interaction with ten of twelve genes previously reported to exhibit positive suppressing interactions with *SLY1-20*, as well as with dozens of additional genes that function in organelle biogenesis and membrane traffic — especially traffic into and through the Golgi (**Fig. 4C; Supplementary Dataset 1**). Gene Ontology (GO) analysis (Mi et al., 2019; The Gene Ontology Consortium, 2019) revealed that enrichment for these gene functions was both selective and statistically significant (**Fig. 4D**). Wild-type *SLY1* activity is also required for resistance to the toxic effects of *SEC17* overproduction (Lobingier et al., 2014; Schwartz et al., 2017), and *SEC17* overproduction caused a severe recessive growth defect in *sly1Δloop* cells (**Fig. 4E**). Overexpression of a mutant, *sec17-FSMS*, caused an even more severe growth defect. Together, the genetic and functional genomic results show that *sly1Δloop* is a recessive loss-of-function allele and not, as expected, a dominant suppressor.

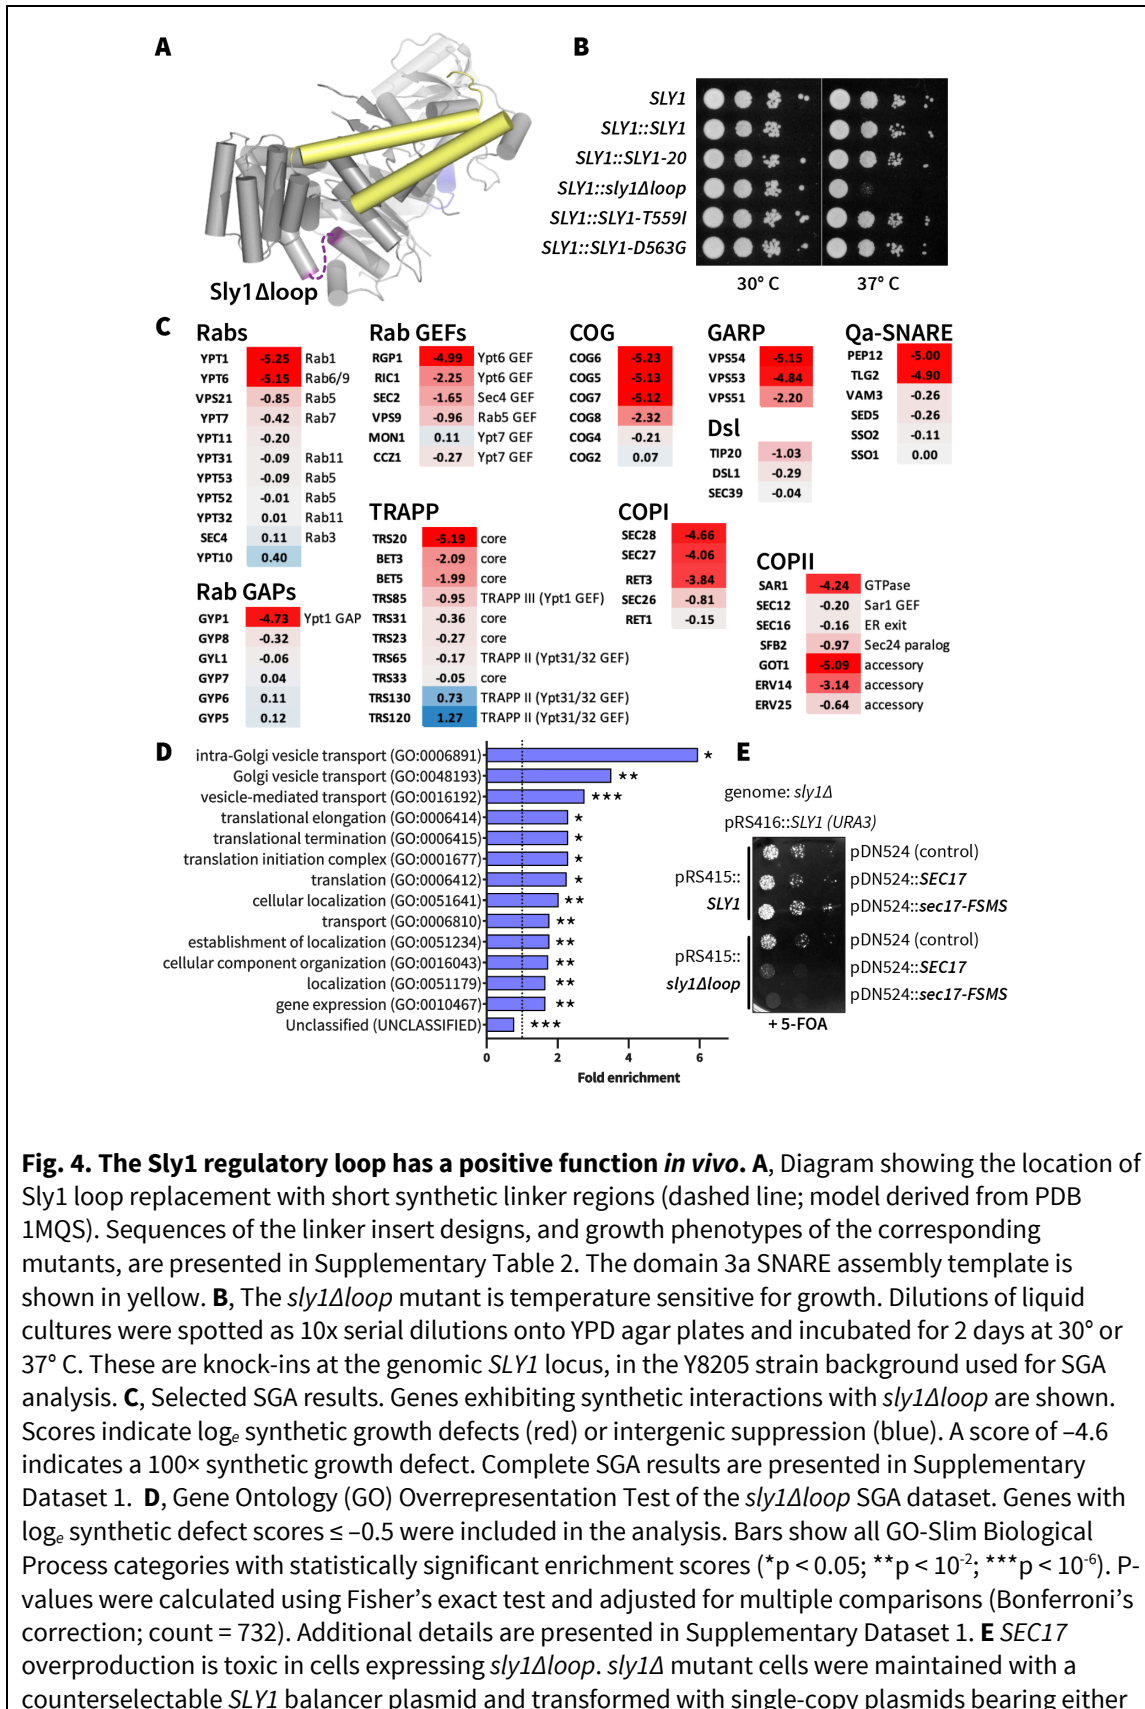

**Fig. 4. The Sly1 regulatory loop has a positive function *in vivo*.** **A**, Diagram showing the location of Sly1 loop replacement with short synthetic linker regions (dashed line; model derived from PDB 1MQS). Sequences of the linker insert designs, and growth phenotypes of the corresponding mutants, are presented in Supplementary Table 2. The domain 3a SNARE assembly template is shown in yellow. **B**, The *sly1Δloop* mutant is temperature sensitive for growth. Dilutions of liquid cultures were spotted as 10x serial dilutions onto YPD agar plates and incubated for 2 days at 30° or 37° C. These are knock-ins at the genomic *SLY1* locus, in the Y8205 strain background used for SGA analysis. **C**, Selected SGA results. Genes exhibiting synthetic interactions with *sly1Δloop* are shown. Scores indicate log<sub>e</sub> synthetic growth defects (red) or intergenic suppression (blue). A score of -4.6 indicates a 100× synthetic growth defect. Complete SGA results are presented in Supplementary Dataset 1. **D**, Gene Ontology (GO) Overrepresentation Test of the *sly1Δloop* SGA dataset. Genes with log<sub>e</sub> synthetic defect scores ≤ -0.5 were included in the analysis. Bars show all GO-Slim Biological Process categories with statistically significant enrichment scores (\*p < 0.05; \*\*p < 10<sup>-2</sup>; \*\*\*p < 10<sup>-6</sup>). P-values were calculated using Fisher's exact test and adjusted for multiple comparisons (Bonferroni's correction; count = 732). Additional details are presented in Supplementary Dataset 1. **E** *SEC17* overproduction is toxic in cells expressing *sly1Δloop*. *sly1Δ* mutant cells were maintained with a counterselectable *SLY1* balancer plasmid and transformed with single-copy plasmids bearing either

*SLY1* or *sly1Δloop*, as well as plasmids carrying *SEC17* or *sec17-FSMS* (Schwartz and Merz, 2009). The balancer plasmid was ejected by plating dilutions on media containing 5-FOA and growth was assayed after 2 days of growth at 30° C.

200

To assess the molecular mechanism of loss-of-function in *Sly1Δloop*, we returned to the chemically defined fusion system. As shown in **Fig.5**, *Sly1Δloop* elicited substantially slower fusion compared to wild-type *Sly1*. Moreover, *Sly1Δloop* was unable to bypass the tethering requirement *in vitro* (**Figs. 5A and C**), consistent with its inability to suppress *Ypt1* and *Uso1* deficiencies *in vivo*. Importantly, in dose-response experiments both *Sly1Δloop* and wild-type *Sly1* exhibited saturating fusion activity at ~100 nM (compare *Sly1Δloop* in **Fig. 5** to wild type *Sly1* in **Fig. 3**). Moreover, *Sly1Δloop* was properly folded as indicated by circular dichroism spectroscopy (**Fig. 5E**). Thus, the fusion defect of *Sly1Δloop* is not due to a major fraction of misfolded protein, and the *sly1Δloop* allele is probably not a simple hypomorph. Instead *Sly1Δloop* is, on a mole-per-mole basis, a less efficient stimulator of SNARE-mediated fusion

205

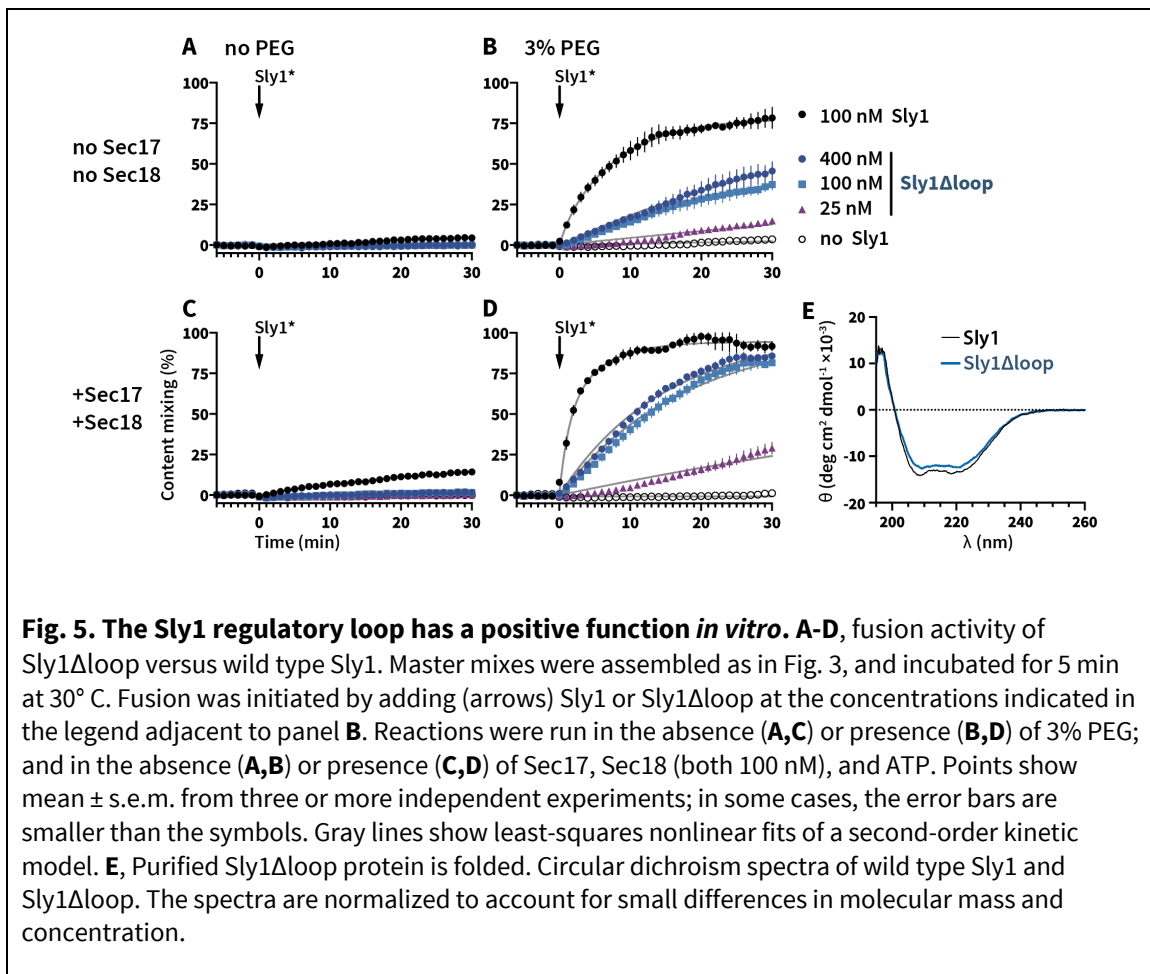

**Fig. 5. The Sly1 regulatory loop has a positive function *in vitro*.** A-D, fusion activity of *Sly1Δloop* versus wild type *Sly1*. Master mixes were assembled as in Fig. 3, and incubated for 5 min at 30° C. Fusion was initiated by adding (arrows) *Sly1* or *Sly1Δloop* at the concentrations indicated in the legend adjacent to panel B. Reactions were run in the absence (A,C) or presence (B,D) of 3% PEG; and in the absence (A,B) or presence (C,D) of Sec17, Sec18 (both 100 nM), and ATP. Points show mean ± s.e.m. from three or more independent experiments; in some cases, the error bars are smaller than the symbols. Gray lines show least-squares nonlinear fits of a second-order kinetic model. E, Purified *Sly1Δloop* protein is folded. Circular dichroism spectra of wild type *Sly1* and *Sly1Δloop*. The spectra are normalized to account for small differences in molecular mass and concentration.

210 compared to the wild type. Taken together, the *in vivo* and *in vitro* data argue that the Sly1 regulatory loop is not only autoinhibitory, but that it also must harbor a positive fusion-promoting activity.

### The loop's positive function resides within ALPS-like helix $\alpha$ 21

215 The regulatory loop's most highly conserved region is helix  $\alpha$ 21 (**Fig. 6A, B**). Interestingly, none of the activating gain-of-function mutations isolated to date map to  $\alpha$ 21. On closer inspection we found that  $\alpha$ 21 is amphipathic (**Fig. 6C**). We therefore designed a mutant, Sly1- $\rho\alpha$ 21, in which helix  $\alpha$ 21 is mutated to render it polar rather than amphipathic. Unexpectedly, the *sly1- $\rho\alpha$ 21* allele caused recessive extremely slow growth or lethality (**Fig. 6D**) — a  
220 phenotype markedly more severe than that conferred by the *sly1 $\Delta$ loop* allele, which lacks the loop altogether.

Amphipathic helices operate as membrane recognition modules across a wide range of proteins, particularly within the early secretory pathway (Bigay and Antonny, 2012). This suggests a working model: the amphipathic  $\alpha$ 21 helix probes for the presence of an incoming  
225 vesicle and binds to the vesicle's membrane, pulling the loop away from the R-SNARE binding site. This disinhibits Sly1, allowing Sly1 to catalyze *trans*-SNARE complex assembly. In this model, the Sly1- $\rho\alpha$ 21 protein is nonfunctional because  $\alpha$ 21 cannot recognize incoming vesicle membranes — and the loop is therefore locked into its auto-inhibited state. To test this hypothesis, we engineered a compound mutant, *SLY1-20- $\rho\alpha$ 21*. This allele comprises both the  
230 activating Sly1-20 mutation (E532K) in  $\alpha$ 20, and the five  $\alpha$ 21-polar substitutions (**Fig. 6d**). Remarkably, *SLY1-20- $\rho\alpha$ 21* cells exhibited wild type growth (**Fig. 6c**). Unlike *SLY1-20*, however, *SLY1-20- $\rho\alpha$ 21* was unable to suppress the lethality of *ypt1-3* or *uso1 $\Delta$*  deficiencies (**Supplementary Table 1**), establishing that the amphipathic character of helix  $\alpha$ 21 is essential for Sly1-20 hyperactivity *in vivo*.



PEG, Sec17 and Sec18 (100 nM each), and ATP (1 mM). Fusion was initiated at time = 0 by adding Sly1 or its mutants, at the concentrations indicated in the legends at the right side of the figure. Points show mean  $\pm$  s.e.m. from three or more independent experiments; in many cases the error bars are smaller than the symbols. Gray lines show least-squares nonlinear fits of a second-order kinetic model.

235 The *in vivo* results were closely mirrored in fusion experiments with RPLs (**Fig. 6 E-G**). Under every condition tested, Sly1- $\alpha$ 21 was less efficient at stimulating fusion than Sly1 $\Delta$ loop. Fusion in the presence of Sly1- $\alpha$ 21 was reduced in the absence or presence of PEG, as well as in the presence or absence of Sec17, Sec18, and ATP. In contrast to Sly1- $\alpha$ 21, the compound mutant Sly1-20- $\alpha$ 21 (**Fig. 6 H-J**) exhibited a greater ability to stimulate fusion under each of  
240 the tested conditions. Importantly, the behaviors of Sly1 $\Delta$ loop and the Sly1-20- $\alpha$ 21 compound mutant were similar. Hence, the amphipathic character of helix  $\alpha$ 21 is required for the loop's positive functions: activation and normal function of wild type Sly1, as well as hyperactivity of Sly1-20, both *in vivo* and *in vitro*.

To further test the hypothesis that the regulatory loop has a positive function we  
245 prepared chimeras, with fragments of the loop appended to the amino terminus of the Sly1 $\Delta$ loop mutant (**Fig. 7A; Supplementary Table 3**). *In vivo*, chimeras bearing the entire loop, or  $\alpha$ 20-21, or  $\alpha$ 21 alone, restored normal growth to Sly1 $\Delta$ loop (**Fig. 7B**). Mutation of five hydrophobic residues within  $\alpha$ 21 eliminated rescue by *loop-SLY1 $\Delta$ loop* or by  *$\alpha$ 20-21-SLY1 $\Delta$ loop*. However, at 30°C the polar mutant  *$\alpha$ 21-SLY1 $\Delta$ loop* grew almost as well as  *$\alpha$ 21-SLY1 $\Delta$ loop*.  
250 The mechanism of rescue by this mutant construct is unclear.

*In vitro* the  $\alpha$ 20-21-Sly1 $\Delta$ loop chimera drove almost wild-type fusion when added at 800 nM, whereas its polar mutant ( $\alpha$ 20- $\alpha$ 21-Sly1 $\Delta$ loop) phenocopied Sly1 $\Delta$ loop. Moreover, in contrast to the result obtained *in vivo*,  $\alpha$ 21-Sly1 $\Delta$ loop exhibited gain of function relative to Sly1 $\Delta$ loop, while its polar mutant  $\alpha$ 21-Sly1 $\Delta$ loop eliminated its gain-of-function relative to  
255 Sly1 $\Delta$ loop. Overall (with the interesting exception of the  *$\alpha$ 21-SLY1 $\Delta$ loop* allele's *in vivo* phenotype), these results indicate that that the evolutionarily conserved portion of the Sly1 loop can partially replace the loop's positive function, even when appended to Sly1 at a non-native location.

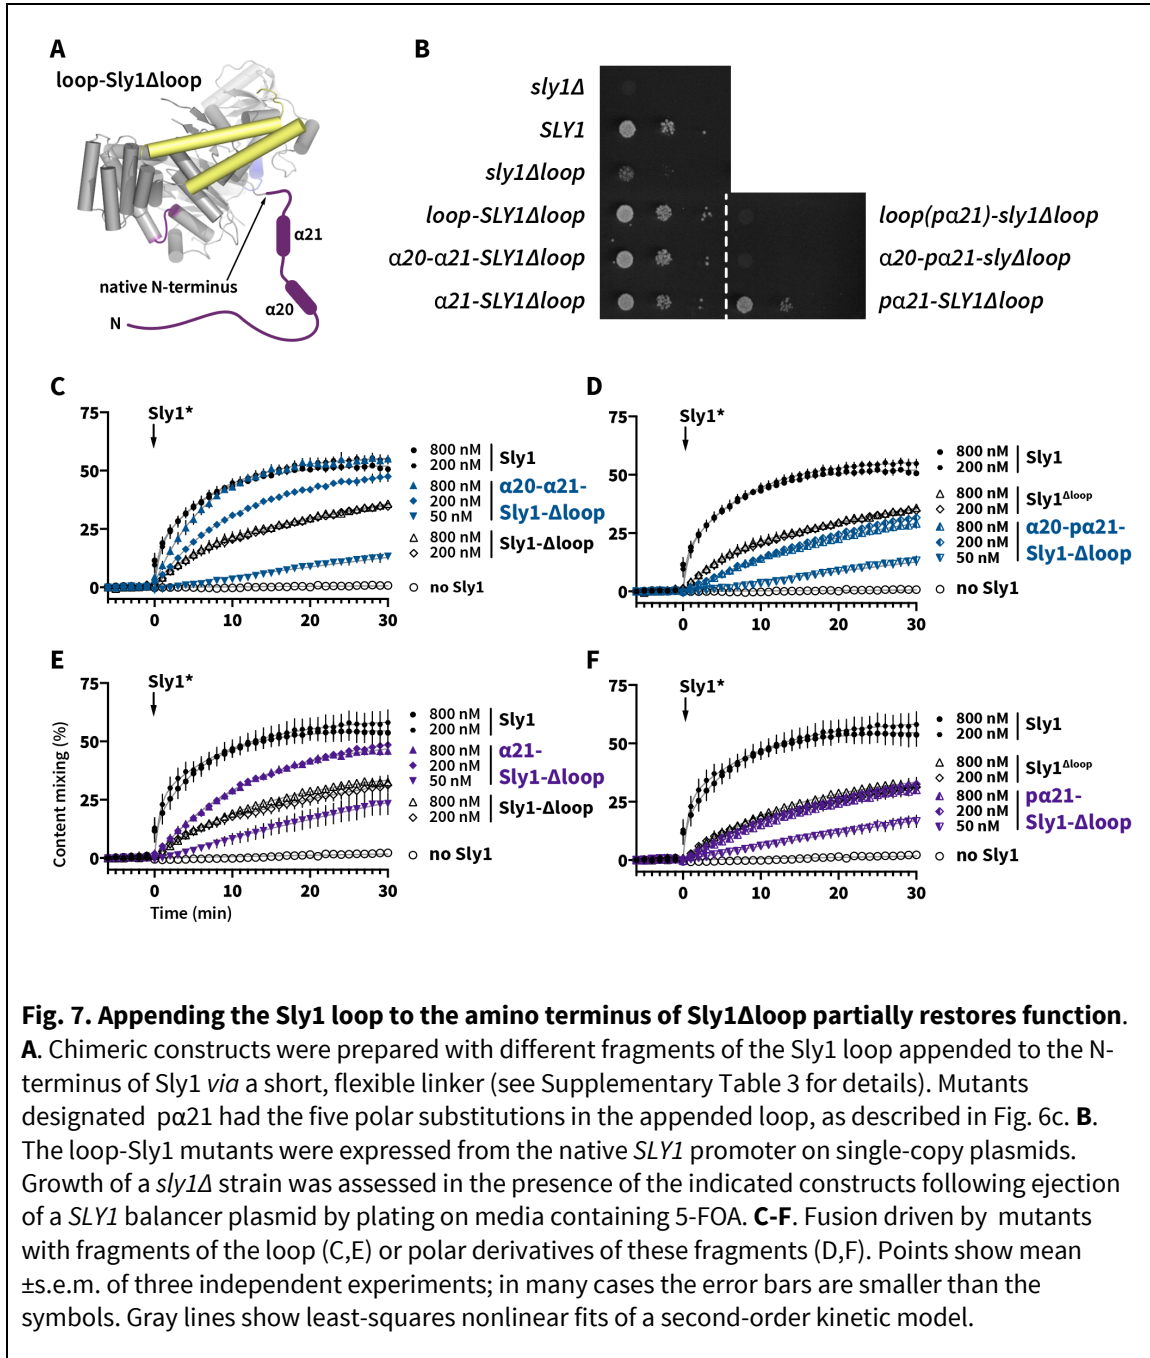



## Helix $\alpha$ 21 can bind lipid bilayers directly, with preference for high curvature

The above data suggest, but don't prove, that Sly1 helix  $\alpha$ 21 binds to membranes, and that the loop allows Sly1 to tether vesicles. To test whether  $\alpha$ 21 binds to membranes we used a FRET assay. A peptide was synthesized comprising  $\alpha$ 21 and flanking residues, with an N-terminal tetramethylrhodamine fluorophore (TMR- $\alpha$ 21). A control peptide, TMR- $\rho\alpha$ 21, contained the same five substitutions as the Sly1- $\rho\alpha$ 21 mutant (see **Fig. 6A**). Small unilamellar vesicles (SUVs) were prepared with 0.8% Texas Red-phosphatidylethanolamine (TRPE) to serve as a FRET acceptor for TMR. Representative emission spectra for the peptides and SUVs are shown in **Fig. 8A**. SUVs were prepared in two nominal diameters (30 and 200 nm), and with either 6.7% or 30% ergosterol. When mixed with TRPE-doped SUVs, the  $\alpha$ 21-TMR peptide

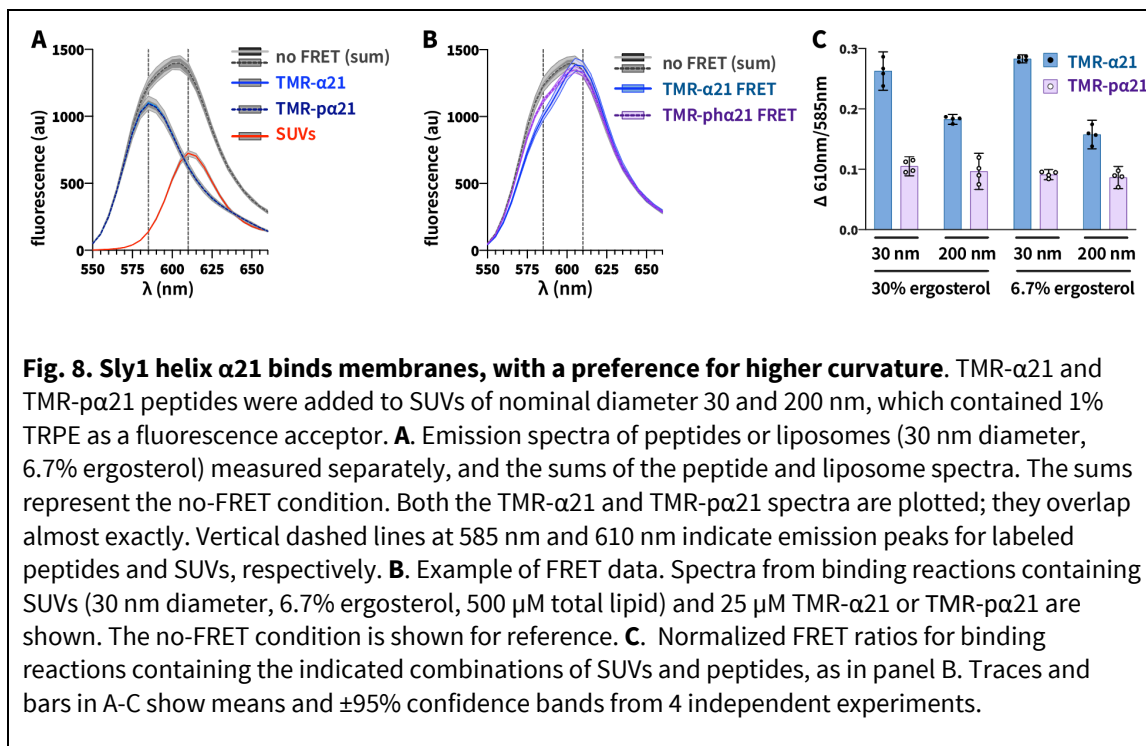

generated a reproducible FRET signal, evident mainly as donor quenching (**Fig. 8B,C**). Under the same conditions, the control TMR- $\rho\alpha$ 21 peptide exhibited smaller FRET signals. Moreover, the TMR- $\alpha$ 21 peptide yielded a larger FRET signal with smaller SUVs, in both the 6.7% and 30% ergosterol conditions (**Fig. 8C**). In contrast, the TMR- $\rho\alpha$ 21 FRET signals did not depend on the SUV diameter. We conclude that helix  $\alpha$ 21 binds directly to membranes through a mechanism involving the apolar residues within  $\alpha$ 21, and that it prefers to bind membranes with higher curvature. This is reminiscent of the behavior of ALPS domains, proposed to operate as

membrane selectivity filters in the early secretory pathway. However, helix  $\alpha$ 21 and the Sly1  
280 loop have a higher fraction of charged residues, and the apolar side chains are less bulky, than  
in canonical ALPS domains (Drin and Antonny, 2010). These differences may explain the  
apparent insensitivity of TMR- $\alpha$ 21 binding to sterol concentration.

### Hyperactive Sly1\* directly tethers vesicles to the Qa-SNARE

285 Sly1 binds to the N-peptide-Habc domain of Sed5 (residues 1-210) with sub-nM affinity  
(Demircioglu et al., 2014; Grabowski and Gallwitz, 1997; Yamaguchi et al., 2002). Thus, we  
hypothesized that Sly1 may tether heterotypically, with one side of Sly1 binding to the N-  
peptide of Sed5 on the target membrane while the other side, via helix  $\alpha$ 21, binds directly to  
the membrane of the R-SNARE-bearing vesicle. To test this hypothesis we adapted a bead-  
290 based assay (**Fig. 9A**) previously used to study Rab-mediated tethering (Lo et al., 2012). First,  
GST-Sed5 cytoplasmic domain (GST-Sed5<sub>cyt</sub>) or control GST protein were adsorbed to  
glutathione-agarose beads. Then Sly1\* wild type or mutant proteins were added and allowed  
to bind to the immobilized GST-Sed5<sub>cyt</sub>. Finally, fluorescent vesicles or RPLs were added to the  
beads, incubated, and imaged by confocal microscopy. If Sly1 or its mutants mediate  
295 tethering between Sed5 and the membranes, the signal will be visible in confocal microscopy  
sections as an equatorial ring of fluorescence on the beads. Qualitative results with wild-type  
and mutant forms of Sly1 are shown in **Fig. 9A**. To quantify this tethering a bead spin-down  
assay was used (**Fig. 9B-D**). When Sly1-20, Sly1-T559I, or Sly1-D563G was added to the beads,  
robust tethering of SNARE-free small unilamellar vesicles (SUVs) was observed (**Figs. 9A,B**).  
300 Tethering was eliminated if either Sly1 or Sed5 (“GST control”) was omitted. Tethering was  
dramatically attenuated with wild type Sly1, with Sly1 $\Delta$ loop, or with Sly1-p $\alpha$ 21. An  
intermediate tethering signal was observed with Sly1-20-p $\alpha$ 21. The partial tethering observed  
with this compound mutant might be due to eight hydrophobic residues on the loop that are  
still present in the Sly1-p $\alpha$ 21 and Sly1-20-p $\alpha$ 21 mutants (see **Fig. 6C**). Robust tethering  
305 therefore requires that the loop be present, that the loop be open, and that helix  $\alpha$ 21 be  
amphipathic. Moreover, as in the peptide binding assays, Sly1-20 mediated tethering was most  
efficient with small-diameter vesicles, and was insensitive to sterol concentration (compare

**Figs. 8C and 9C).** Together these findings indicate that both helix  $\alpha$ 21 in isolation, and the Sly1 loop in the context of Sly1-20, sense membrane curvature.

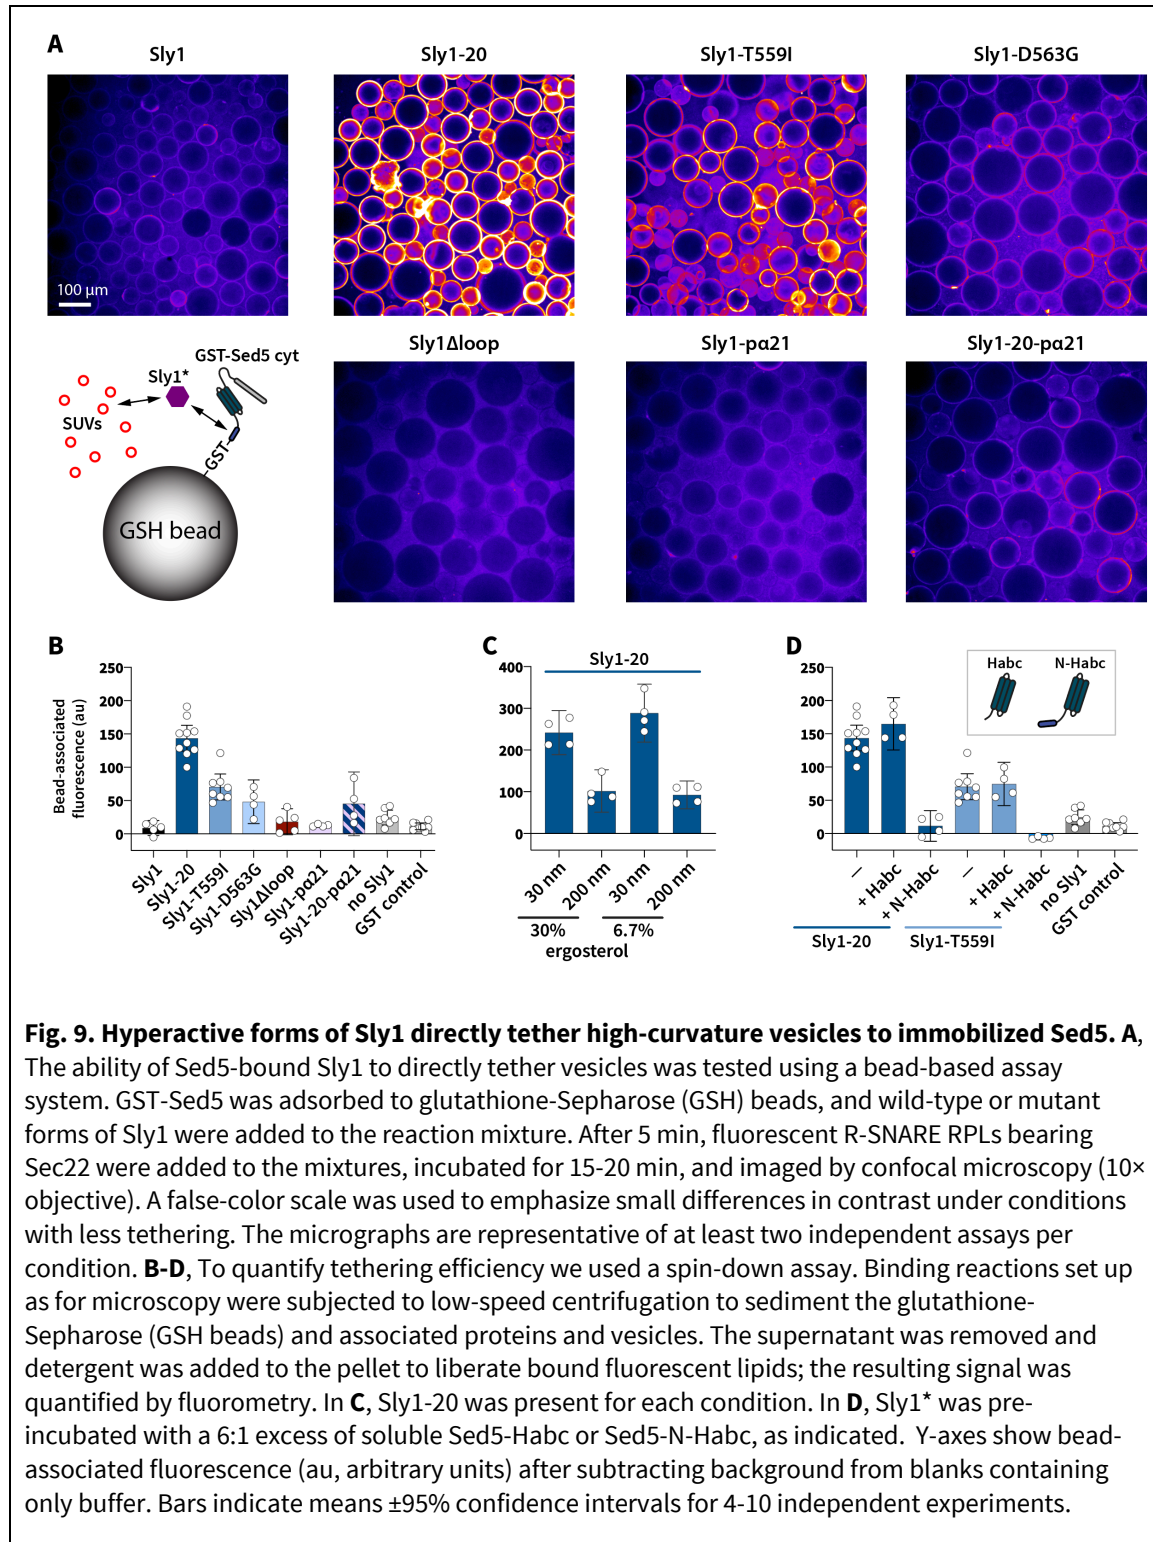

310 Sly1 binds the Sed5 N-terminal domain with sub-nM affinity (aa 1-21; Bracher and  
Weissenhorn, 2002; Demircioglu et al., 2014; Yamaguchi et al., 2002). To test the importance of  
this binding interaction in tethering, Sly1-20 was pre-incubated with a 6:1 molar excess of  
Sed5-N-Habc (aa 1-210; **Fig. 9D**). This abolished tethering. In contrast, tethering was not  
315 blocked by Sed5-Habc (aa 22-210), which lacks the N-peptide. Thus, to tether vesicles Sly1  
must bind the N-peptide of the immobilized Qa-SNARE. Taken together the present and  
previously reported genetic data, and our assays of *in vitro* fusion, peptide binding, and  
tethering, all support the conclusion that the amphipathic helix  $\alpha$ 21 is necessary and  
sufficient for direct Sly1 binding to the incoming vesicle's lipid bilayer. This binding both de-  
represses Sly1 and allows it to tether incoming vesicles at close range.

320

## DISCUSSION

*SLY1* was identified through isolation of the *SLY1-20* as a dominant single-copy suppressor of  
deficiency in *YPT1*, which encodes the yeast Rab1 ortholog. It soon became apparent that Ypt1  
325 regulates ER-Golgi transport, and that *SLY1* gain-of-function alleles might become hyperactive  
through the loss of negative regulation. The present experiments strongly support that  
hypothesis, but further demonstrate that helix  $\alpha$ 21 has at least two functions. First,  $\alpha$ 21 is  
needed for relief of Sly1 autoinhibition. Second,  $\alpha$ 21 has a positive function. Both  $\alpha$ 21  
functions are essential for bypass of tethering requirements by *SLY1-20*, and both require the  
330 presence of conserved apolar residues within  $\alpha$ 21. The same apolar residues are required for  
direct binding of  $\alpha$ 21 to membranes. Sly1 mutants lacking the loop, or with a constitutively  
open loop that has reduced membrane affinity, exhibit loss of function relative to the wild  
type. Thus, the loop's ability to bind membranes has functions beyond relief of Sly1  
autoinhibition.

335

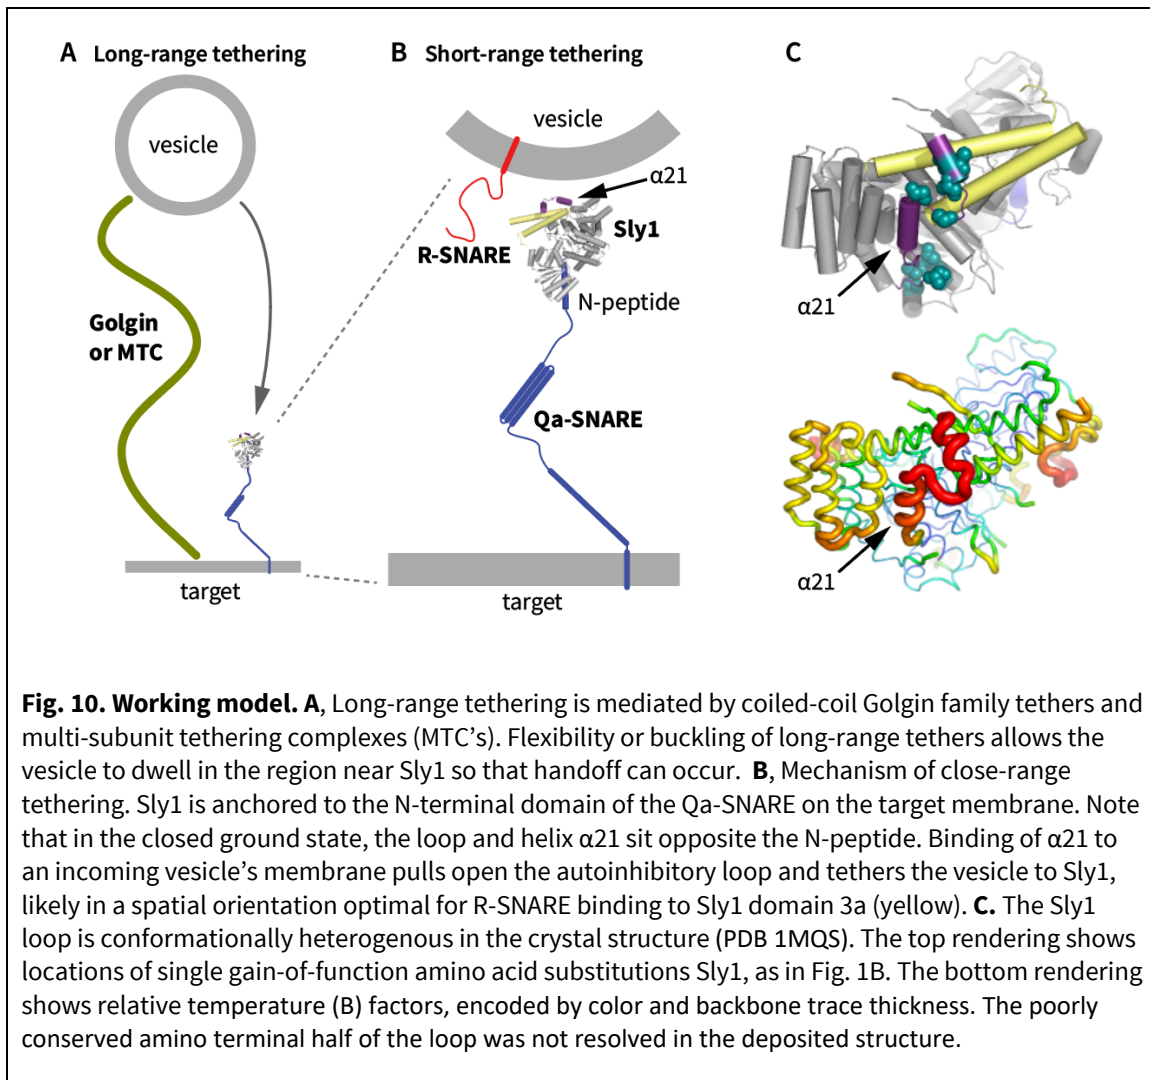

In a working model (**Fig. 10A**), long-range tethers such as Uso1/p115 mediate initial capture of the vesicle, operating at ranges of 30-200 nm or more. Multisubunit Tethering Complexes (MTCs) including GARP, Dsl, and COG have long, floppy appendages (Chou et al., 2016; Ha et al., 2016; Ren et al., 2009). Golgins have an extended coiled-coil structure; their rod-like coiled-coil domains are interspersed with hinge-like domains. (Cheung and Pfeffer, 2016; Gillingham, 2018) In two cases, Golgin-210 and the Golgin-like endosomal tether EEA1, there is evidence that the hinges cause the tether to buckle or collapse, allowing the vesicle to approach the target membrane (Cheung et al., 2015; Murray et al., 2016). We propose that in the early secretory pathway long-range tethering factors hand vesicles off to Sly1, which would tether vesicles at a range of ~15 nm from the target membrane to promote *trans*-SNARE complex assembly (**Fig. 10B**). The Sly1 loop's preference for small-diameter vesicles in our

340

345

binding and tethering assays is reminiscent of the behavior of ALPS domains, which seem to operate as selectivity filters that recognize bulk physical properties of membranes in the early secretory pathway (Bigay et al., 2005; Bigay and Antonny, 2012; Drin et al., 2008; Magdeleine et al., 2016). We propose that Sly1's tethering function adds an additional layer of selectivity to this system.

In the anterograde ER-Golgi pathway both Sly1 and the Qa-SNARE Sed5 must be present on the Golgi acceptor membrane; they cannot fulfill their functions if located only on COPII-derived transport vesicles (Cao and Barlowe, 2000). Sly1 is anchored to Sed5 through a direct, sub-nanomolar interaction with the Sed5 N-terminal domain (Bracher and Weissenhorn, 2002; Demircioglu et al., 2014; Yamaguchi et al., 2002). As our experiments show, Sly1 binding to the Sed5 N-peptide is indispensable for Sly1-mediated tethering (**Fig. 10B**). However, a previous report argued that the Sed5-Sly1 interaction is of relatively minor importance (Peng and Gallwitz, 2004). In the companion manuscript (Duan et al., submitted) we show, consistent with tethering experiments presented here, that deletion of the Sed5 N-peptide severely impairs fusion *in vitro* and is lethal *in vivo*.

Sitting almost exactly opposite Sly1's N-peptide-binding cleft is the Sly1 loop (**Fig. 10B**). The loop is mobile: in the Sly1 crystal structure the poorly conserved N-terminal half of the loop is unresolved, while the better-conserved C-terminal half of the loop is partially resolved but exhibits a high temperature (B) factor (**Fig. 10C**), an indication of conformational heterogeneity. We speculate that when Sly1 is in its auto-inhibited ground state, helix  $\alpha 21$  undergoes a "log-rolling" rotation about its long axis, intermittently exposing apolar side chains to probe for the presence of incoming vesicle membranes. Helix  $\alpha 21$  binding to the vesicle bilayer has two consequences. First, the loop is pulled open, exposing the R-SNARE binding surface on Sly1. Second, the loop operates as a close-range tether, stabilizing the vesicle and target membrane within a distance sufficient to allow R-SNARE binding to Sly1 and the nucleation of a *trans*-SNARE complex on Sly1 domain 3a. The Sly1 loop might also constrain the rotational motion of Sly1 so that Sly1 is optimally oriented for productive R-SNARE binding. Although the available data are entirely consistent with this working model, we emphasize that many details are provisional and should be tested in future studies.

In our *in vitro* tethering assays, Sly1-20 and other gain-of-function mutants allow efficient tethering, consistent with the ability of these mutants to suppress requirements for other tethering factors. In the same *in vitro* assays, however, wild type Sly1 tethers much less efficiently. This raises the question of whether close-range tethering is important for wild type  
380 Sly1. The Sly1 $\Delta$ loop mutant cannot be auto-inhibited, yet it exhibits substantial tethering and fusion defects *in vitro*. *In vivo*, our SGA analyses revealed that the *sly1 $\Delta$ loop* allele exhibits synthetic sick or lethal interactions with dozens of genes involved in ER and Golgi traffic, including many genes that encode tethering factors or their regulators. In other words, when close-range tethering is prevented even partial defects in long-range tethering result in  
385 catastrophe and death. We suggest that a key function of Golgi long-range tethers is to allow incoming vesicles to dwell in the vicinity of Sly1 for long enough to allow inspection of vesicle membrane properties by  $\alpha$ 21, leading to loop opening, close-range tethering, R-SNARE binding, and assembly of a fusion-proficient *trans*-SNARE complex.

Additional mechanisms might contribute to the Sly1 loop's function. First, it is  
390 possible that as-yet unidentified proteins bind Sly1, contributing to loop opening and tethering. Second, when open (as in Sly1-20), the loop may be intrinsically disordered, generating a "steric cushion" that locally exerts force on the adjacent docked membranes (Busch et al., 2015; D'Agostino et al., 2017). Our evidence for such a steric cushion mechanism is equivocal. *In vitro*, the behavior of Sly1 $\Delta$ loop, which completely lacks the loop, and of Sly1-  
395 20-p $\alpha$ 20, which has a full-length loop that is constitutively open but partially defective in membrane binding, exhibit similar defects in most assays. This would argue against the steric cushion hypothesis. *In vivo*, however, *Sly1-20-p $\alpha$ 20* allows almost wild type growth, while the *sly1 $\Delta$ loop* mutant grows slowly. Finally, it is possible that  $\alpha$ 21 binding to the vesicle locally perturbs its membrane structure, lowering the energy barrier for the onset of lipid mixing.  
400 Additional work will be needed to evaluate these potential mechanisms.

Sly1 has been proposed to promote vesicle fusion in several ways. (i) The Golgi Qa/t-SNARE Sed5 can adopt a tightly closed, autoinhibited conformation. Sly1 can open closed Sed5, allowing SNARE complexes to form more readily, at least in aqueous solution (Demircioglu et al., 2014; Kosodo et al., 1998). (ii) As we have shown here, helix  $\alpha$ 21 binding to  
405 membranes both de-represses and directly promotes Sly1 activity through a mechanism

involving close-range vesicle tethering. (iii) Sly1 has conserved structural features that in Munc18-1 and Vps33 have been shown to catalyze *trans*-SNARE complex assembly through a Qa-R-SNARE templating mechanism. (iv) We have shown (again in aqueous solution but corroborated by genetic experiments) that Sly1 can decrease the rate of SNARE complex  
410 disassembly by Sec17 and Sec18. In the accompanying manuscript (Duan et al., submitted) we argue that that each of these mechanisms contributes to Sly1 function and that all are required for full Sly1 activity. In particular, we show that the close-range tethering mechanism characterized here is central Sly1's ability to selectively nucleate *trans*- versus *cis*-SNARE complexes.

415 The Sly1 loop is conserved among Sly1 homologs from yeast to human but is absent from representatives of the three other SM sub-families: Sec1/Munc18, Vps45, and Vps33. Why is the loop unique to Sly1? We suggest that Sly1 must function in a considerably broader variety of cellular and molecular contexts than other SM's. For example, the endosomal SM Vps45 associates with a scaffold protein, Vac1 (in mammals, Rabenosyn-5). Vac1 binds both  
420 Rab5 and phosphatidylinositol-3-phosphate, and might mediate close-range tethering in a manner analogous to the Sly1 loop (Burd et al., 1997; Peterson et al., 1999; Rahajeng et al., 2010; Tall et al., 1999). Similarly, Sec1 physically and functionally interacts with the exocyst tethering complex, and Vps33 is stably associated with Vps-C tethering complexes including HOPS and CORVET, which subsume both tethering and SNARE assembly functions (Morgera et  
425 al., 2012; Rieder and Emr, 1997). In the case of exocyst, the tethering activity is subject to autoinhibition, which is apparently released by engagement of rho family GTPases (Rossi et al., 2020).

In an interesting parallel, an ALPS-like domain within the HOPS subunit Vps41 was proposed to select high-curvature endocytic vesicles for docking and fusion (Cabrera et al.,  
430 2010). We also note that Munc18-1, despite lacking the Sly1-specific regulatory loop, is reported to tether vesicles in a reaction that requires at least the Qa-SNARE N-peptide and the R-SNARE on the opposing membrane (Arnold et al., 2017; Tareste et al., 2008). It is not clear whether Munc18-1 mediated tethering entails a direct interaction between Munc18-1 and the vesicle bilayer. This parallel may suggest that close-range tethering is a subreaction common  
435 to SM function.



Which specific long-range tethers hand vesicles off to Sly1 for close-range tethering, docking, and fusion? Persuasive experiments show that Sly1 operates in concert with Ypt1 and Uso1 (yeast Rab1 and p115, respectively) on the anterograde ER-Golgi pathway (Cao and Barlowe, 2000). However, direct interactions between Sly1 and Ypt1 or Uso1 have not been  
440 detected. Binding interactions have been detected between human Sly1 and COG, and perhaps between yeast Sly1 and Dsl (Kraynack et al., 2005; Laufman et al., 2009). However, the positive suppressing interactions of *SLY1-20*, the negative synthetic sick or lethal interactions of *sly1Δloop*, and the known SNARE interactions of Sly1, all point to Sly1 operating as  
445 “receiving agent” for vesicular traffic into the ER, early Golgi compartments, and perhaps later Golgi compartments as well. Additionally, several ER and Golgi tethers are reported to bind directly to Sly1 client SNAREs. Thus Sly1 might accept cargo containers presented by COG, GARP, TRAPP, Dsl, and the various Golgins. A significant challenge for the future is to identify the combinations of long-range tethers and SNAREs that operate in concert with Sly1, and to delineate the mechanisms that coordinate handoffs from long-range tethers to the core  
450 fusion machinery.

## MATERIALS & METHODS

**Yeast strains and *SLY1* gain-of-function screen.** We use standard *Saccharomyces* genetic nomenclature (Dunham et al., 2015). Dominant alleles, whether wild type or mutant, are  
455 named in uppercase type (e.g., *SLY1-20*); recessive alleles are named in lowercase (e.g., *sly1Δloop*). Strains and plasmids used in this study are described in **Supplementary Table 4**. To obtain new suppressors of *uso1Δ*, a library of *SLY1*\* mutant alleles was constructed using the GeneMorph II Random Mutagenesis Kit (Agilent #200550). The *SLY1* open reading frame  
460 was amplified using the "medium mutation rate" PCR protocol. Four mutagenic PCR pools were separately purified and cloned into a derivative of the yeast vector pRS415, which contained 431 bp of the *SLY1* promoter and 249 bp of the *SLY1* terminator, using traditional restriction–ligation methods. Aliquots of the pRS415::*SLY1* mutant library ligation products were transformed into TOP10F´ chemically competent *E. coli* cells, and 10 individual clones  
465 were Sanger sequenced to assess cloning fidelity and mutation frequency. Each clone sequenced contained the *SLY1* open reading frame with 0-4 mutations, with about 50% of the clones containing mutations. After the *SLY1* mutant library pools were verified, aliquots of the mutant library ligation products were transformed into Bioline Alpha-Select Gold Efficiency Competent *E. coli* cells. Transformant colonies were scraped from the LB + Amp  
470 transformation plates (maintaining four separate mutant pools), and allowed to grow for about two doublings. Plasmid DNA was extracted and purified from each of the pooled cultures using Qiaquick columns. 1ug of plasmid DNA from each *SLY1* mutagenic pool was transformed into *S. cerevisiae* strain AMY2144 (CBY1297: *uso1Δ* pRS426::*USO1*). Transformant colonies were grown under selection for leucine auxotrophy, then replica plated to synthetic complete medium containing 5-FOA, and incubated for 2 days. Yeast colonies that grew on 5-  
475 FOA (thus "kicking out" the WT copy of *USO1*) were struck out on –LEU plates, and plasmid DNA was purified from ten or more clones from each pooled library, using the Smash and Grab procedure. Plasmids were Sanger sequenced. On the basis of these results, pRS415::*SLY1* single mutant alleles were constructed. Site-directed *SLY1*\* mutants were constructed using  
480 PCR and Gibson assembly, and are described in **Supplementary Tables 1-3**. The second half of *sly1-pa21* gene and its derivative *SLY1-20-pa21* (see **Supplementary Table 2**) were ordered as a gBlock (IDT) and cloned into the BamHI and NcoI sites on the wild-type *SLY1* plasmid.

**SGA analysis.** A query strain (AMY2443) was constructed in the Y9205 genetic background (Tong and Boone, 2005), with *sly1Δloop* and a linked nourseothricin (*NAT*) marker integrated through allelic replacement at the native *SLY1* locus. This query strain was crossed to the *MAT a* haploid deletion and DAmP libraries, where each individual genetic perturbation is marked with a *KAN* resistance marker (Breslow et al., 2008; Tong and Boone, 2005). Diploids were selected by robotic pinning (Singer RoToR) onto YPD + 100 mg/L clonNAT + 200 mg/L G418, then induced to sporulate by pinning to sporulation medium (20g/L agar, 10g/L potassium acetate, 1g/L yeast extract, 0.5g/L glucose, 0.1g/L amino acid supplement [2g histidine, 10g leucine, 2g lysine, 2g uracil]) and growth at room temperature for 5 days. Spores were subsequently pinned to haploid selection medium (SD -His/Arg/Lys + 50 mg/L canavanine + 50 mg/L thialysine) and *MAT a* meiotic progeny grown for 2 days at 25° C. This haploid selection step was repeated, and the resulting colonies imaged using a Phenobooth (Singer) imaging system. These colonies encompass all potential meiotic progeny and serve as the control strains for phenotypic normalization. Haploid double mutants carrying both the *KAN* deletion allele and the *sly1Δloop::NAT* allele were selected by pinning meiotic progeny to double selection medium (SD/MSG -His/Arg/Lys + 50mg/L canavanine + 50 mg/L thialysine +100 mg/L clonNAT + 200 mg/L G418). After 2 days of growth at 25° C, this selection step was repeated and duplicate plates incubated at either 30° C or 37° C. Plates were imaged using the Phenobooth system, and colony size differences calculated using PhenoSuite software and web app (<https://singerinstruments.shinyapps.io/phenobooth/>).

**Protein purification.** Full-length SNARE proteins were produced as previously described (Furukawa and Mima, 2014) with modifications. *E. coli* Rosetta2 (DE3) pLysS cells (Novagen) harboring each of the SNARE expression plasmids with 3C protease-cleavable N-terminal tags (pET-41/GST-His<sub>6</sub> for SEC22 and pET-30/His<sub>6</sub> for SED5, BOS1 and BET1) were inoculated from a 1:1000 dilution of the starter culture grown in MDAG-135 medium (Studier, 2005) into 1 L of Terrific Broth supplemented with 100 µg/mL Kanamycin and 34 µg/mL Chloramphenicol and grown at 37°C, 275 rpm until OD600 reached ~1. Cultures were then induced with 1 mM IPTG for 3 h at 37°C. Cultures were harvested at 5000 × g and cell pellets were snap frozen with liquid nitrogen. Each liter yielded ~10 g of wet cells, which were stored at -70°C. For

purification, the frozen pellets were warmed to  $-10^{\circ}\text{C}$  and broken up into small pieces with a metal spatula, then resuspended at a ratio of 5 mL of buffer per g of cell paste in 1 $\times$  SNARE  
515 buffer (20 mM Na $\cdot$ PO $_4$ , 500 mM NaCl, 10% (m/v) glycerol, 1 mM DTT, pH 7) supplemented with  
30-40 mM imidazole, 0.25 mg/mL chicken egg lysozyme, 125 U benzonase per g of cells, and 1 $\times$   
Sigmafast Protease inhibitor cocktail. 4 mL (1/10 volume) of 1 M n-octyl- $\beta$ -D-glucopyranoside  
in H $_2$ O ( $\beta$ -OG, Anatrace) was added to 100 mM final concentration; the suspension was rotated  
at room temperature for 25 min to allow detergent-aided enzymatic lysis. Lysates were  
520 clarified at 16,500  $\times$  g,  $4^{\circ}\text{C}$  for 10 min, transferred to clean centrifuge tubes and centrifuged  
again for 20 min. Clarified lysates were batch-bound with 2ml of Ni-Sepharose HP equilibrated  
in 1 $\times$  SNARE buffer with  $\beta$ -OG for 30 minutes. SNARE-bound resin was washed in plastic  
disposable columns with 25 mL of SNARE buffer supplemented with  $\beta$ -OG and 60-100 mM  
imidazole. SNARE proteins were eluted with SNARE buffer supplemented with  $\beta$ -OG and 200-  
525 300 mM imidazole, and snap frozen in liquid nitrogen. Purified protein was quantified using by  
absorbance at 280 nm and purity was assessed with SDS-PAGE with Coomassie blue staining.  
Protein aliquots were stored at  $-70^{\circ}\text{C}$  until reconstitution. We note that 3C protease caused  
substantial unintended cleavage of Bos1 in its N-terminal linker domain due to a cryptic 3C  
site (148-GLPLYQ/GL-155). Mutation of the poorly-conserved residue Q153 to aspartic acid  
530 eliminated unintended proteolysis.

Soluble domains of Sed5 were expressed from the pET-30 vector (for H $_6$ -Habc and H $_6$ -  
N21-Habc) or pET-49 vector (for GST-H $_6$ -SED5 $\Delta$ TM) and purified in same way as the full length  
protein except that the temperature was lowered to  $35^{\circ}\text{C}$  prior to induction, the buffers did  
not contain  $\beta$ -OG, and lysis was performed using Emulsiflex-C5 high pressure homogenizer  
535 (Avestin). Eluted protein was exchanged into FB160M1 (20 mM HEPES-KOH, 160 mM KOAc,  
10% (m/v) Glycerol, 1mM MgOAc $_2$ , pH 7) using a PD-10 desalting column. Precipitated material  
was removed by centrifugation at 10,000  $\times$  g for 10 minutes and soluble protein aliquots were  
snap frozen in liquid nitrogen in 250ul PCR tubes and stored at  $-80^{\circ}\text{C}$ . Sec22(SNARE)-GFP-His $_8$   
was expressed from the pST50Trc1 vector in Rosetta2(DE3) cells grown in ZYM-5052  
540 autoinduction media (Studier, 2005) supplemented with carbenicillin (100  $\mu\text{g}/\text{mL}$ ) and  
chloramphenicol (34  $\mu\text{g}/\text{mL}$ ) overnight ( $>16\text{ h}$ ) at  $30^{\circ}\text{C}$  from a 1:1000 dilution of starter culture.  
Cells were harvested and protein was purified as for soluble domains of Sed5. Sec17 was

purified as described (Schwartz and Merz, 2009) except that the culture was grown in ZYM-5052 autoinduction media (Studier, 2005) at 37°C until OD<sub>600nm</sub> was ~0.8; temperature was then  
545 lowered to 18°C and the culture was incubated for ~24 hours. Sly18 was purified as described (Haas and Wickner, 1996).

Sly1 and its mutants were expressed in Rosetta2(DE3) cells from pHIS-Parallel1 vectors (Lobingier et al., 2014; Sheffield et al., 1999). Frozen glycerol stocks were used to inoculate overnight starter cultures at 37° C in MDAG-135 containing 100 mg/L carbenicillin  
550 and 50 mg/L chloramphenicol (Studier, 2005). Each starter culture was diluted 1/1000 to seed 1-2 L of Terrific Broth containing 100 mg/L carbenicillin and 34 mg/L chloramphenicol. These cultures were grown in an orbital shaker (37° C, 275 rpm) to OD<sub>600nm</sub> ~1. Cultures were then transferred to a prechilled shaker at 16°C for 1 h before induction with 0.1-1 mM IPTG for 18 h. Cells were sedimented and resuspended in cold Sly1 buffer (20 mM Na<sub>2</sub>PO<sub>4</sub>, 500 mM NaCl, 10%  
555 (m/v) glycerol, 1 mM DTT, pH 7) supplemented with 30 mM imidazole, 0.25 mg/mL chicken egg lysozyme and 1× Sigmafast Protease inhibitor cocktail at a ratio of 5 mL of buffer per g of cell paste. The cells were lysed by passing through Emulsiflex-C5 high pressure homogenizer (Avestin) 2-4 times and the lysate was clarified by centrifugation at (16,500 × g, 25 min , 4° C). Clarified lysate from 1 L of culture (2 L for Sly1Δloop and Sly1-20) was bound in batch with 1  
560 mL equilibrated Ni<sup>2+</sup>-Sephacrose HP resin (GE) for 30 min at 4° C. Sly1-bound resin was collected in a 25 mL disposable Econo-Pac column (Bio-Rad) by gravity and washed with 25 mL of SLY1 buffer supplemented with 50 mM imidazole at pH 7. Sly1 was eluted with Sly1 buffer supplemented with 300 mM imidazole pH 7 in 0.5 mL fractions. Most of the protein eluted in fractions 3-7. Sly1 was exchanged into FB160M1 (20 mM HEPES·KOH, 160 mM KOAc,  
565 10% m/v Glycerol, 1 mM MgOAc<sub>2</sub>, pH 7) using a PD-10 column (GE Healthcare). Precipitated material was removed by centrifugation at 10,000 × g for 10 minutes and soluble protein were diluted or concentrated to ~2.4 mg/mL. Aliquots were snap-frozen in liquid nitrogen in thin-wall PCR tubes and stored at -70° C.

Recombinant HRV3C protease was prepared either as an N-terminal His<sub>8</sub>-tag fusion  
570 (AMP2019) or an N-terminal GST-His<sub>6</sub>-(Thrombin) fusion (AMP2016). 1 L of 1/1000 dilution of an overnight culture of Rosetta2(DE3) cells harboring the expression plasmid was grown overnight at 37° C in ZYM-5052 autoinduction media with 100 µg/mL kanamycin and 34 µg/mL

chloramphenicol. Cells were centrifuged, resuspended in 4 times the volume of Lysis buffer (50 mM Tris-HCl pH 8.0, 300 mM NaCl, 10% glycerol, 1 mM DTT, and no protease inhibitors) supplemented with 15 mM imidazole and 0.5 mg/mL lysozyme, and lysed using Emulsiflex-C5 high pressure homogenizer (Avestin). Clarified lysate was incubated with 3 mL Ni<sup>2+</sup>-Sephacrose HP (GE) for ~30 min and strained in a disposable column. Resin was washed thoroughly with Lysis buffer supplemented with 40-60 mM imidazole and protein was eluted with 200 mM imidazole in about 7.5 mL. Concentrated fractions were combined and EDTA was added to 1 mM. The yield was ~100 mg of purified protease per 1 L of culture. Purified protease was diluted to 10 mg/ml and exchanged into storage buffer (50 mM Tris-HCl (pH 8.0), 150 mM NaCl, 1 mM EDTA, 1 mM DTT, and 20% glycerol.), frozen in liquid N<sub>2</sub>, and stored at -80°C. Protease activity of the preparations was assayed using a homemade assay based on a linked FRET pair of fluorescent proteins (Evers et al., 2006), modified with an HRV 3C-cleavable linker. Reduction in FRET due to proteolysis was monitored in real time using a SpectraMax Gemini microplate reader (Molecular Devices).

GST-His<sub>6</sub> was expressed and purified using conventional Ni<sup>2+</sup> IMAC chromatography methods. Protein was exchanged into FB160M1 before freezing in liquid N<sub>2</sub> and stored at -80°C.

**Circular Dichroism Spectroscopy.** Purified SLY1wt or SLY1Δloop was exchanged into CD buffer (20 mM Na-Pi, 100 mM NaCl, pH 7.2), diluted to 0.2 mg/mL, and loaded into a 0.1 cm path length cuvette. Spectroscopy was performed using a J-1500 CD Spectrophotometer (JASCO) at 25°C. CD and absorbance were measured from λ = 195 to 260 nm in steps of 0.1 nm. The protein concentration during each read was determined from absorbance at 205 nm, using the extinction coefficient at 205 nm calculated by the Anthis and Clore method (<http://nickanthis.com/tools/a205.html>) for each protein. Molar ellipticity for each protein was calculated by dividing the CD at each wavelength by the cuvette pathlength and protein concentration. Mean residue ellipticity for each protein was calculated by dividing the Molar ellipticity by the number of amino acids per protein.

**Preparation of RPLs.** The FB160 buffer system and lipid mixtures used here are derived from B88 buffer, used extensively in COPII vesicle budding assays (Baker et al., 1988), and from lipidomic studies. The ER lipid mix is based on “Major-Minor” mixtures used for COPII budding

(Antonny et al., 2001; Matsuoka et al., 1998), while the Golgi-mix is based on lipidomic surveys (Klemm et al., 2009; Schneider et al., 1999). In particular, the study of Schneider et al. used a highly enriched Golgi fraction known to be competent for docking and fusion of COPII carrier vesicles (Lupashin et al., 1996). Relatively high concentrations of ergosterol were used based prior work on COPII budding, which demonstrated that higher sterol levels yielded more morphologically homogenous COPII budding profiles (Matsuoka et al., 1998). In pilot studies, however, RPLs prepared with lower ergosterol concentrations exhibited similar fusion characteristics, including Sly1 and PEG dependence, as the high-sterol RPLs used in the experiments presented here. Lipids were obtained from Avanti Polar Lipids as chloroform stocks (Alabaster, AL) except for ergosterol, which was from Sigma-Aldrich. **Supplementary Table S5** lists the proportions, working stocks, and volumes of lipids and detergent used to prepare ER-mix and Golgi-mix RPLs. Lipid stocks were prepared or purchased in chloroform, except for ergosterol and phosphatidylinositol-4-phosphate, which were dissolved in 1:1 chloroform:methanol.  $\beta$ -OG stock solutions were prepared in methanol. Lipid-detergent films were prepared by transferring lipid and  $\beta$ -OG stocks to a glass vial (typically, 8  $\mu$ mol total lipids and 70  $\mu$ mol  $\beta$ -OG). The mixture was dried under a nitrogen stream; residual solvent was removed using a Speedvac™ evaporator. The lipid-detergent film was hydrated and solubilized with 400  $\mu$ L 5 $\times$  FB160M1 by three cycles of bath sonication and shaking. To the lipid- $\beta$ -OG mixture, content mixing FRET reporters were then added (500  $\mu$ L of 4 mg/mL solution of R-phycoerythrin-biotin conjugate, or 296  $\mu$ L of 2mg/mL Alexa-Streptavidin; both reagents from Thermo/Molecular Probes). SNARE stocks in SNARE elution buffer with  $\beta$ -OG were then added to a final molar ratio of 1:600 (each Q-SNARE) or 1:300 (Sec22) to total phospholipids. Water was used to fill the headspace necessary to dilute 5 $\times$  FB160M1 buffer to 1 $\times$  concentration (2 mL final volume). Mixtures were nutated for 30 minutes before recombinant 3C protease was added (in 1:10 ratio to total SNAREs) to cleave affinity tags from the SNARE proteins during dialysis. The resulting mixtures were dialyzed (20 kDa cutoff) for ~18h at 4°C in the dark against 250 volumes of FB160M1 containing 2 g BioBeads SM2 (Bio-Rad, Hercules, CA) per 2 mL of RPL mixture. The RPL mixture was then separated from unencapsulated content mixing probe by floating the RPLs up a step gradient of iso-osmotic Histodenz (35/25/0%) in FB160M1 (SW60Ti rotor at 55k rpm for 90 min), harvested, and diluted to 2 mM phospholipid. Phospholipid was quantified by measuring the fluorescence of the membrane fluorophore, initially verified by

inorganic phosphate analysis (Chen et al., 1956). 32  $\mu$ L aliquots of RPLs were transferred to thin-  
635 wall PCR tubes and frozen by immersion in liquid N<sub>2</sub>. RPLs prepared by this method and stored  
at  $-80^{\circ}$  C were stable and fusion-competent, with minimal leakage of encapsulated FRET  
probes, for at least one year.

**RPL fusion assays.** Unless noted otherwise, a standard order-of-addition was always used to  
initiate RPL assays. 250  $\mu$ M (final phospholipid) of each RPL was premixed with PEG6K and  
640 other fusion components such as Sec17, Sec18 and ATP. Fusion assays were performed in 20  
 $\mu$ L sample volumes in 384-well plates (Corning #4514). The reactions were monitored in a  
plate-based fluorimeter (Molecular Devices Gemini XPS or EM) for 5 min to establish a  
baseline, then Sly1 was added to initiate fusion. Except as noted, the moment of Sly1 addition  
was defined as time = 0. Lipid mixing was monitored with Ex<sub>370nm</sub> and Em<sub>465nm</sub>. Content mixing  
645 was monitored with Ex<sub>565nm</sub> and Em<sub>670nm</sub>. Graphs show mean  $\pm$  s.e.m. of  $n \geq 3$  independent  
assays. Curves on the graphs show a second-order kinetic model fit to each dataset using a  
weighted least-squares algorithm in GraphPad Prism. Some experiments were run in both the  
presence and absence of unlabeled streptavidin, to assess leakage of RPL aqueous contents.  
For content mixing, typical signal for a complete reaction over background (*e.g.*, no Sly1)  
650 exceeded 50:1.

**Yeast growth assays.** Yeast strains containing pRS426::*USO1* or pRS416::*YPT1* and  
pRS415::*SLY1* mutant plasmids were grown in  $-LEU$  liquid media, then diluted using a 48-pin  
manifold or a multichannel pipettor onto 5-FOA plates. The 5-FOA plates were grown at  
restrictive or non-restrictive temperatures, as indicated. Growth was scored relative to  
655 positive and negative control strains after 2-3 days.

**Peptide-liposome binding assay.** To prepare small Texas RED-DHPE labeled unilamellar  
vesicles, lipid chloroform stocks were mixed using Hamilton syringes in glass vials, dried  
under a nitrogen stream, and residual solvent was removed in a Speedvac™ concentrator. The  
resulting lipid films were rehydrated with FB160M1 and either sonicated or extruded using an  
660 Avanti mini extruder with 0.03, 0.05 or 0.2  $\mu$ m polycarbonate filters (Whatman). Peptides were  
custom-synthesized with a tetramethylrhodamine (TMR) fluorophore at the N-terminus, and  
were >98% pure by HPLC. The fluorophore is zwitterionic and does not change the net charge



(+1) of the peptides. Emission spectra were acquired using a Molecular Devices Gemini XPS fluorescence spectrometer. FRET ratios were calculated as the ratio of fluorescence emission at 610 and 585 nm. The data were normalized by comparing each sample to the corresponding no-FRET condition (sum of the FRET signals for each peptide and SUV, acquired separately):

$$\Delta 610\text{nm}/585\text{nm} = (\text{no-FRET}_{610\text{nm}/585\text{nm}}) - (\text{FRET}_{610\text{nm}/585\text{nm}})$$

**Bead-based tethering assays.** Beads were prepared in 100  $\mu\text{L}$  (10 reactions) or 1 mL (100 reactions) batches. In small disposable spin columns, 100  $\mu\text{L}$  of beads were washed in FB160M1 supplemented with 1% (m/v) bovine serum albumin (FB160M1BSA), and were loaded with 100  $\mu\text{g}$  of GST-Sed5 cytoplasmic domain (1/5 of the resin's nominal binding capacity; 150 pmol protein per 10  $\mu\text{L}$  resin in a 1 $\times$  reaction), in a volume of 500  $\mu\text{L}$  FB160BSA; this mixture was incubated, with slow agitation, for 30 min at room temperature. Unbound material was removed by gentle centrifugation ( $\sim 70 \times g$ , 10 seconds), the beads were washed once with FB160BSA, and the beads were then blocked by adding excess recombinant GST-His<sub>6</sub> protein (1.25 mg; 2.5  $\times$  the resin's nominal binding capacity) in FB160BSA, in 500  $\mu\text{L}$  final volume. Unbound GST-H6 was not removed. The bead-SED5-GST suspension was stored at 4 $^{\circ}$  for up to a week. For tethering assays, 1 $\times$  reaction aliquots of the bead-SED5-GST suspension (50  $\mu\text{L}$ , containing  $\sim 10 \mu\text{L}$  packed beads) were transferred to 250  $\mu\text{L}$  PCR tubes, then Sly1\* (75 pmol; a 1:2 molar ratio to Sed5<sub>cyt</sub>) was added to each reaction tube in 50  $\mu\text{L}$  volume, allowing the Sly1\* to bind to the immobilized GST-Sed5<sub>cyt</sub> in 100  $\mu\text{L}$  final volume. For competition experiments the Sly1\* was pre-incubated with a 6-fold molar excess (450 pmol) of Sed5 Habc or N-Habc domain for 10 min at room temperature before adding the Sly1\*-competitor mixture to the beads. Tethering was initiated by adding Texas-red-DHPE labeled SUVs to each 1 $\times$  tethering reaction (1-6  $\mu\text{L}$  depending on stock concentration). The tethering reactions were incubated for 15-20 min at room temperature, then transferred to wells of chambered coverslips that had been pre-incubated with FB160BSA for at least 20 min. These preparations were observed at ambient temperature ( $23 \pm 2^{\circ} \text{C}$ ) using a Nikon Ti2 microscope equipped with a Yokogawa CSU-X1 spinning disk confocal unit, a Toptica iChrome MLE laser combiner and launch; 405, 488, 561, and 647 nm diode lasers (Coherent); a Finger Lakes high-speed emission filter wheel; and a Mad City piezoelectric Z-stage. The microscope was controlled by Nikon

Elements software and data analysis and figure preparation was done with the Fiji package of Image/J software and plug-ins. Tethering reactions were observed using a 10× 0.30 NA Plan  
695 Fluor objective and an Andor 888 EMCCD camera operated at an EM gain of 300 with 200 ms exposure per frame.

Tethering was also quantified using bead spin-down assays. Binding reactions were initiated as in the microscopy-based tethering experiments. To quantify SUVs tethered to the beads, the beads were washed once in 1.3 mL of FB160BSA and then sedimented for 1 min at 500 × g  
700 in a swinging-bucket rotor. The supernatant was carefully removed, and resin-bound lipids were eluted from the beads with 50 µL of BugBuster protein extraction reagent (Millipore). The beads were again sedimented. To quantify the amount of eluted TRPE lipid, 20 µL of the final supernatant was analyzed in a plate-reading fluorimeter (Molecular Devices Gemini XPS or Gemini EM; excitation 595 nm; cutoff 610 nm; emission 615 nm).

705

## ACKNOWLEDGEMENTS

We are grateful to Drs. M. Ailion, J. Bai, R. Baker, J. Cattin, S. Hoppins, I. Topalidou, and M. Zick for helpful advice and critical comments on the manuscript; C. Barlowe, C. Boone, and D. Waugh for antibodies and strains, D. Baker and the University of Washington Institute for Protein Design for  
710 computational resources, and D. Beacham (Molecular Probes/Thermo Fisher) for gifts of fluorescent reagents. These studies were supported by NIH/NIGMS R01 GM077349 and the University of Washington (AM), NIH/NIGMS T32 GM007270 (UN), NIH MARC T34 GM083883 (BD) and Medical Research Council MC\_UP\_1201/10 (EM).

## REFERENCES

715

Antonny, B., D. Madden, S. Hamamoto, L. Orci, and R. Schekman. 2001. Dynamics of the COPII coat with GTP and stable analogues. *Nat Cell Biol.* 3:531-537.

Arnold, M. G., P. Adhikari, B. Kang, and H. Xu 徐昊. 2017. Munc18a clusters SNARE-bearing liposomes prior to trans-SNARE zippering. *Biochem J.* 474:3339-3354.

720

Baker, D., L. Hicke, M. Rexach, M. Schleyer, and R. Schekman. 1988. Reconstitution of SEC gene product-dependent intercompartmental protein transport. *Cell.* 54:335-344.

Baker, R. W., and F. M. Hughson. 2016. Chaperoning SNARE assembly and disassembly. *Nat Rev Mol Cell Biol.* 17:465-479.

725

Baker, R. W., P. D. Jeffrey, M. Zick, B. P. Phillips, W. T. Wickner, and F. M. Hughson. 2015. A direct role for the Sec1/Munc18-family protein Vps33 as a template for SNARE assembly. *Science.* 349:1111-1114.

Ballew, N., Y. Liu, and C. Barlowe. 2005. A Rab requirement is not bypassed in SLY1-20 suppression. *Mol Biol Cell.* 16:1839-1849.

730

Banta, L. M., T. A. Vida, P. K. Herman, and S. D. Emr. 1990. Characterization of yeast Vps33p, a protein required for vacuolar protein sorting and vacuole biogenesis. *Mol Cell Biol.* 10:4638-4649.

Bensen, E. S., B. G. Yeung, and G. S. Payne. 2001. Ric1p and the Ypt6p GTPase function in a common pathway required for localization of trans-Golgi network membrane proteins. *Mol Biol Cell.* 12:13-26.

735

Bigay, J., and B. Antonny. 2012. Curvature, lipid packing, and electrostatics of membrane organelles: defining cellular territories in determining specificity. *Dev Cell.* 23:886-895.

Bigay, J., J. F. Casella, G. Drin, B. Mesmin, and B. Antonny. 2005. ArfGAP1 responds to membrane curvature through the folding of a lipid packing sensor motif. *EMBO J.* 24:2244-2253.

Bracher, A., and W. Weissenhorn. 2002. Structural basis for the Golgi membrane recruitment of Sly1p by Sed5p. *EMBO J.* 21:6114-6124.

740

Breslow, D. K., D. M. Cameron, S. R. Collins, M. Schuldiner, J. Stewart-Ornstein, H. W. Newman, S. Braun, H. D. Madhani, N. J. Krogan, and J. S. Weissman. 2008. A comprehensive strategy enabling high-resolution functional analysis of the yeast genome. *Nat Methods.* 5:711-718.

Burd, C. G., M. Peterson, C. R. Cowles, and S. D. Emr. 1997. A novel Sec18p/NSF-dependent complex required for Golgi-to-endosome transport in yeast. *Mol Biol Cell.* 8:1089-1104.

745

Busch, D. J., J. R. Houser, C. C. Hayden, M. B. Sherman, E. M. Lafer, and J. C. Stachowiak. 2015. Intrinsically disordered proteins drive membrane curvature. *Nat Commun.* 6:7875.

Cabrera, M., L. Langemeyer, M. Mari, R. Rethmeier, I. Orban, A. Perz, C. Brocker, J. Griffith, D. Klose, H. J. Steinhoff, F. Reggiori, S. Engelbrecht-Vandre, and C. Ungermann. 2010. Phosphorylation of a membrane curvature-sensing motif switches function of the HOPS subunit Vps41 in membrane tethering. *J Cell Biol.* 191:845-859.

750

Cao, X., and C. Barlowe. 2000. Asymmetric requirements for a Rab GTPase and SNARE proteins in fusion of COPII vesicles with acceptor membranes. *J Cell Biol.* 149:55-66.

Carr, C. M., and J. Rizo. 2010. At the junction of SNARE and SM protein function. *Curr Opin Cell Biol.* 22:488-495.

755

Chen, P. S., T. Y. T. Toribara, and H. Warner. 1956. Microdetermination of phosphorus. *Analytical chemistry.* 28:1756-1758.

Cheung, P. Y., C. Limouse, H. Mabuchi, and S. R. Pfeffer. 2015. Protein flexibility is required for vesicle tethering at the Golgi. *Elife.* 4

760

Cheung, P. Y., and S. R. Pfeffer. 2016. Transport Vesicle Tethering at the Trans Golgi Network: Coiled Coil Proteins in Action. *Front Cell Dev Biol.* 4:18.

Chou, H. T., D. Dukovski, M. G. Chambers, K. M. Reinisch, and T. Walz. 2016. CATCHR, HOPS and CORVET tethering complexes share a similar architecture. *Nat Struct Mol Biol.* 23:761-763.

- Cowles, C. R., S. D. Emr, and B. F. Horazdovsky. 1994. Mutations in the VPS45 gene, a SEC1 homologue, result in vacuolar protein sorting defects and accumulation of membrane vesicles. *J Cell Sci.* 107:3449-3459.
- 765 D'Agostino, M., H. J. Risselada, A. Lürick, C. Ungermann, and A. Mayer. 2017. A tethering complex drives the terminal stage of SNARE-dependent membrane fusion. *Nature.*
- Dascher, C., R. Ossig, D. Gallwitz, and H. D. Schmitt. 1991. Identification and structure of four yeast genes (SLY) that are able to suppress the functional loss of YPT1, a member of the RAS
- 770 superfamily. *Mol Cell Biol.* 11:872-885.
- Demircioglu, F. E., P. Burkhardt, and D. Fasshauer. 2014. The SM protein Sly1 accelerates assembly of the ER-Golgi SNARE complex. *Proc Natl Acad Sci U S A.* 111:13828-13833.
- Drin, G., and B. Antonny. 2010. Amphipathic helices and membrane curvature. *FEBS Lett.* 584:1840-1847.
- Drin, G., V. Morello, J. F. Casella, P. Gounon, and B. Antonny. 2008. Asymmetric tethering of flat and
- 775 curved lipid membranes by a golgin. *Science.* 320:670-673.
- Duan, M., G. Gao, D. Banfield, T. Takenaka, and A. J. Merz. submitted. Golgi SM protein Sly1 promotes productive trans-SNARE complex assembly through multiple mechanisms.
- Dunham, M. J., M. R. Gartenberg, and G. W. Brown. 2015. Methods in yeast genetics and genomics, 2015 edition: a CSHL course manual.
- 780 Evers, T. H., E. M. van Dongen, A. C. Faesen, E. W. Meijer, and M. Merckx. 2006. Quantitative understanding of the energy transfer between fluorescent proteins connected via flexible peptide linkers. *Biochemistry.* 45:13183-13192.
- Furukawa, N., and J. Mima. 2014. Multiple and distinct strategies of yeast SNAREs to confer the specificity of membrane fusion. *Sci Rep.* 4:4277.
- 785 Gillingham, A. K., and S. Munro. 2019. Transport carrier tethering - how vesicles are captured by organelles. *Curr Opin Cell Biol.* 59:140-146.
- Gillingham, A. K. 2018. At the ends of their tethers! How coiled-coil proteins capture vesicles at the Golgi. *Biochemical Society Transactions.* 46:43-50.
- Grabowski, R., and D. Gallwitz. 1997. High-affinity binding of the yeast cis-Golgi t-SNARE, Sed5p, to wild-type and mutant Sly1p, a modulator of transport vesicle docking. *FEBS Lett.* 411:169-172.
- 790 Grote, E., C. M. Carr, and P. J. Novick. 2000. Ordering the final events in yeast exocytosis. *J Cell Biol.* 151:439-452.
- Ha, J. Y., H. T. Chou, D. Ungar, C. K. Yip, T. Walz, and F. M. Hughson. 2016. Molecular architecture of the complete COG tethering complex. *Nat Struct Mol Biol.* 23:758-760.
- 795 Haas, A., and W. Wickner. 1996. Homotypic vacuole fusion requires Sec17p (yeast alpha-SNAP) and Sec18p (yeast NSF). *EMBO J.* 15:3296-3305.
- Jiao, J., M. He, S. A. Port, R. W. Baker, Y. Xu, H. Qu, Y. Xiong, Y. Wang, H. Jin, T. J. Eisemann, F. M. Hughson, and Y. Zhang. 2018. Munc18-1 catalyzes neuronal SNARE assembly by templating SNARE association. *Elife.* 7
- 800 Jun, Y., and W. Wickner. 2019. Sec17 ( $\alpha$ -SNAP) and Sec18 (NSF) restrict membrane fusion to R-SNAREs, Q-SNAREs, and SM proteins from identical compartments. *Proceedings of the National Academy of Sciences.* 201913985.
- Kapust, R. B., K. M. Routzahn, and D. S. Waugh. 2002. Processive degradation of nascent polypeptides, triggered by tandem AGA codons, limits the accumulation of recombinant tobacco etch virus protease in Escherichia coli BL21(DE3). *Protein Expr Purif.* 24:61-70.
- 805 Klemm, R. W., C. S. Ejsing, M. A. Surma, H. J. Kaiser, M. J. Gerl, J. L. Sampaio, Q. de Robillard, C. Ferguson, T. J. Proszynski, A. Shevchenko, and K. Simons. 2009. Segregation of sphingolipids and sterols during formation of secretory vesicles at the trans-Golgi network. *J Cell Biol.* 185:601-612.
- Kosodo, Y., Y. Noda, and K. Yoda. 1998. Protein-protein interactions of the yeast Golgi t-SNARE Sed5 protein distinct from its neural plasma membrane cognate syntaxin 1. *Biochem Biophys Res Commun.* 250:212-216.
- 810

- Kraynack, B. A., A. Chan, E. Rosenthal, M. Essid, B. Umansky, M. G. Waters, and H. D. Schmitt. 2005. Dsl1p, Tip20p, and the novel Dsl3(Sec39) protein are required for the stability of the Q/t-SNARE complex at the endoplasmic reticulum in yeast. *Mol Biol Cell*. 16:3963-3977.
- 815 Laufman, O., A. Kedan, W. Hong, and S. Lev. 2009. Direct interaction between the COG complex and the SM protein, Sly1, is required for Golgi SNARE pairing. *EMBO J*. 28:2006-2017.
- Leaver-Fay, A., M. Tyka, S. M. Lewis, O. F. Lange, J. Thompson, R. Jacak, K. Kaufman, P. D. Renfrew, C. A. Smith, W. Sheffler, I. W. Davis, S. Cooper, A. Treuille, D. J. Mandell, F. Richter, Y. E. Ban, S. J. Fleishman, J. E. Corn, D. E. Kim, S. Lyskov, M. Berrondo, S. Mentzer, Z. Popović, J. J. Havranek, J. Karanicolas, R. Das, J. Meiler, T. Kortemme, J. J. Gray, B. Kuhlman, D. Baker, and P. Bradley. 2011. ROSETTA3: an object-oriented software suite for the simulation and design of macromolecules. *Methods Enzymol*. 487:545-574.
- 820 Li, Y., D. Gallwitz, and R. Peng. 2005. Structure-based functional analysis reveals a role for the SM protein Sly1p in retrograde transport to the endoplasmic reticulum. *Mol Biol Cell*. 16:3951-3962.
- 825 Li, Y., H. D. Schmitt, D. Gallwitz, and R. W. Peng. 2007. Mutations of the SM protein Sly1 resulting in bypass of GTPase requirement in vesicular transport are confined to a short helical region. *FEBS Lett*. 581:5698-5702.
- Lo, S. Y., C. L. Brett, R. L. Plemel, M. Vignali, S. Fields, T. Gonen, and A. J. Merz. 2012. Intrinsic tethering activity of endosomal Rab proteins. *Nat Struct Mol Biol*. 19:40-47.
- 830 Lobingier, B. T., D. P. Nickerson, S. Y. Lo, and A. J. Merz. 2014. SM proteins Sly1 and Vps33 co-assemble with Sec17 and SNARE complexes to oppose SNARE disassembly by Sec18. *Elife*. 3:e02272.
- Lupashin, V. V., S. Hamamoto, and R. W. Schekman. 1996. Biochemical requirements for the targeting and fusion of ER-derived transport vesicles with purified yeast Golgi membranes. *J Cell Biol*. 132:277-289.
- 835 Ma, C., L. Su, A. B. Seven, Y. Xu, and J. Rizo. 2013. Reconstitution of the vital functions of Munc18 and Munc13 in neurotransmitter release. *Science*. 339:421-425.
- Magdeleine, M., R. Gautier, P. Gounon, H. Barelli, S. Vanni, and B. Antonny. 2016. A filter at the entrance of the Golgi that selects vesicles according to size and bulk lipid composition. *Elife*. 5
- 840 Matsuoka, K., L. Orci, M. Amherdt, S. Y. Bednarek, S. Hamamoto, R. Schekman, and T. Yeung. 1998. COPII-coated vesicle formation reconstituted with purified coat proteins and chemically defined liposomes. *Cell*. 93:263-275.
- Mi, H., A. Muruganujan, D. Ebert, X. Huang, and P. D. Thomas. 2019. PANTHER version 14: more genomes, a new PANTHER GO-slim and improvements in enrichment analysis tools. *Nucleic Acids Res*. 47:D419-D426.
- 845 Morgera, F., M. R. Sallah, M. L. Dubuke, P. Gandhi, D. N. Brewer, C. M. Carr, and M. Munson. 2012. Regulation of exocytosis by the exocyst subunit Sec6 and the SM protein Sec1. *Mol Biol Cell*. 23:337-346.
- Murray, D. H., M. Jahnel, J. Lauer, M. J. Avellaneda, N. Brouilly, A. Cezanne, H. Morales-Navarrete, E. D. Perini, C. Ferguson, A. N. Lupas, Y. Kalaidzidis, R. G. Parton, S. W. Grill, and M. Zerial. 2016. An endosomal tether undergoes an entropic collapse to bring vesicles together. *Nature*. 537:107-111.
- 850 Novick, P., R. Schekman, P. Novick, C. Field, and R. Schekman. 1979. Secretion and cell-surface growth are blocked in a temperature-sensitive mutant of *Saccharomyces cerevisiae*. Identification of 23 complementation groups required for post-translational events in the yeast secretory pathway. *Proc Natl Acad Sci U S A Cell*. 76:1858-1862.
- 855 Ossig, R., C. Dascher, H. H. Trepte, H. D. Schmitt, and D. Gallwitz. 1991. The yeast SLY gene products, suppressors of defects in the essential GTP-binding Ypt1 protein, may act in endoplasmic reticulum-to-Golgi transport. *Mol Cell Biol*. 11:2980-2993.
- 860 Ossig, R., W. Laufer, H. D. Schmitt, and D. Gallwitz. 1995. Functionality and specific membrane localization of transport GTPases carrying C-terminal membrane anchors of synaptobrevin-like proteins. *Embo J*. 14:3645-3653.

- Patterson, J. T. 1932. A New Type of Mottled-Eyed *Drosophila* Due to an Unstable Translocation. *Genetics*. 17:38-59.
- Peng, R., and D. Gallwitz. 2002. Sly1 protein bound to Golgi syntaxin Sed5p allows assembly and contributes to specificity of SNARE fusion complexes. *J Cell Biol*. 157:645-655.
- Peng, R., and D. Gallwitz. 2004. Multiple SNARE interactions of an SM protein: Sed5p/Sly1p binding is dispensable for transport. *EMBO J*. 23:3939-3949.
- Peterson, M. R., C. G. Burd, and S. D. Emr. 1999. Vac1p coordinates Rab and phosphatidylinositol 3-kinase signaling in Vps45p-dependent vesicle docking/fusion at the endosome. *Curr Biol*. 9:159-162.
- Piper, R. C., E. A. Whitters, and T. H. Stevens. 1994. Yeast Vps45p is a Sec1p-like protein required for the consumption of vacuole-targeted, post-Golgi transport vesicles. *Eur J Cell Biol*. 65:305-318.
- Rahajeng, J., S. Caplan, and N. Naslavsky. 2010. Common and distinct roles for the binding partners Rabenosyn-5 and Vps45 in the regulation of endocytic trafficking in mammalian cells. *Exp Cell Res*. 316:859-874.
- Reilly, B. A., B. A. Kraynack, S. M. VanRheenen, and M. G. Waters. 2001. Golgi-to-endoplasmic reticulum (ER) retrograde traffic in yeast requires Dsl1p, a component of the ER target site that interacts with a COPI coat subunit. *Mol Biol Cell*. 12:3783-3796.
- Ren, Y., C. K. Yip, A. Tripathi, D. Huie, P. D. Jeffrey, T. Walz, and F. M. Hughson. 2009. A structure-based mechanism for vesicle capture by the multisubunit tethering complex Dsl1. *Cell*. 139:1119-1129.
- Rieder, S. E., and S. D. Emr. 1997. A novel RING finger protein complex essential for a late step in protein transport to the yeast vacuole. *Mol Biol Cell*. 8:2307-2327.
- Rizo, J., and T. C. Sudhof. 2012. The membrane fusion enigma: SNAREs, Sec1/Munc18 proteins, and their accomplices--guilty as charged? *Annu Rev Cell Dev Biol*. 28:279-308.
- Rossi, G., D. Lepore, L. Kenner, A. B. Czuchra, M. Plooster, A. Frost, M. Munson, and P. Brennwald. 2020. Exocyst structural changes associated with activation of tethering downstream of Rho/Cdc42 GTPases. *J Cell Biol*. 219
- Ruohola, H., A. K. Kabcenell, and S. Ferro-Novick. 1988. Reconstitution of protein transport from the endoplasmic reticulum to the Golgi complex in yeast: the acceptor Golgi compartment is defective in the sec23 mutant. *J Cell Biol*. 107:1465-1476.
- Sacher, M., Y. Jiang, J. Barrowman, A. Scarpa, J. Burston, L. Zhang, D. Schieltz, J. R. Yates, 3rd, H. Abeliovich, and S. Ferro-Novick. 1998. TRAPP, a highly conserved novel complex on the cis-Golgi that mediates vesicle docking and fusion. *Embo J*. 17:2494-2503.
- Sapperstein, S. K., V. V. Lupashin, H. D. Schmitt, and M. G. Waters. 1996. Assembly of the ER to Golgi SNARE complex requires Uso1p. *J Cell Biol*. 132:755-767.
- Schneider, R., B. Brügger, R. Sandhoff, G. Zellnig, A. Leber, M. Lampl, K. Athenstaedt, C. Hrastnik, S. Eder, G. Daum, F. Paltauf, F. T. Wieland, and S. D. Kohlwein. 1999. Electrospray ionization tandem mass spectrometry (ESI-MS/MS) analysis of the lipid molecular species composition of yeast subcellular membranes reveals acyl chain-based sorting/remodeling of distinct molecular species en route to the plasma membrane. *J Cell Biol*. 146:741-754.
- Schwartz, M. L., and A. J. Merz. 2009. Capture and release of partially zipped trans-SNARE complexes on intact organelles. *J Cell Biol*. 185:535-549.
- Schwartz, M. L., D. P. Nickerson, B. T. Lobingier, R. L. Plemel, M. Duan, C. G. Angers, M. Zick, and A. J. Merz. 2017. Sec17 ( $\alpha$ -SNAP) and an SM-tethering complex regulate the outcome of SNARE zippering in vitro and in vivo. *Elife*. 6
- Sevrioukov, E. A., J. P. He, N. Moghrabi, A. Sunio, and H. Kramer. 1999. A role for the deep orange and carnation eye color genes in lysosomal delivery in *Drosophila*. *Mol Cell*. 4:479-486.
- Sheffield, P., S. Garrard, and Z. Derewenda. 1999. Overcoming expression and purification problems of RhoGDI using a family of "parallel" expression vectors. *Protein Expr Purif*. 15:34-39.
- Sogaard, M., K. Tani, R. R. Ye, S. Geromanos, P. Tempst, T. Kirchhausen, J. E. Rothman, and T. Sollner. 1994. A rab protein is required for the assembly of SNARE complexes in the docking of transport vesicles. *Cell*. 78:937-948.

- Studier, F. W. 2005. Protein production by auto-induction in high-density shaking cultures. *Protein Expression and Purification*. 41:207-234.
- 915 Sudhof, T. C., and J. E. Rothman. 2009. Membrane fusion: grappling with SNARE and SM proteins. *Science*. 323:474-477.
- Tall, G. G., H. Hama, D. B. DeWald, and B. F. Horazdovsky. 1999. The phosphatidylinositol 3-phosphate binding protein Vac1p interacts with a Rab GTPase and a Sec1p homologue to facilitate vesicle-mediated vacuolar protein sorting. *Mol Biol Cell*. 10:1873-1889.
- 920 Tareste, D., J. Shen, T. J. Melia, and J. E. Rothman. 2008. SNAREpin/Munc18 promotes adhesion and fusion of large vesicles to giant membranes. *Proc Natl Acad Sci U S A*. 105:2380-2385.
- The Gene Ontology Consortium. 2019. The Gene Ontology Resource: 20 years and still GOing strong. *Nucleic Acids Res*. 47:D330-D338.
- Tong, A. H., and C. Boone. 2005. Synthetic Genetic Array Analysis in *Saccharomyces cerevisiae*. *Methods Mol Biol*. 313:171-192.
- 925 van Leeuwen, J., C. Pons, J. C. Mellor, T. N. Yamaguchi, H. Friesen, J. Koschwanez, M. M. Ušaj, M. Pechlaner, M. Takar, M. Ušaj, B. VanderSluis, K. Andrusiak, P. Bansal, A. Baryshnikova, C. E. Boone, J. Cao, A. Cote, M. Gebbia, G. Horecka, I. Horecka, E. Kuzmin, N. Legro, W. Liang, N. van Lieshout, M. McNee, B. J. San Luis, F. Shaeri, E. Shuteriqi, S. Sun, L. Yang, J. Y. Youn, M. Yuen, M. Costanzo, A. C. Gingras, P. Aloy, C. Oostenbrink, A. Murray, T. R. Graham, C. L. Myers, B. J. Andrews, F. P. Roth, and C. Boone. 2016. Exploring genetic suppression interactions on a global scale. *Science*. 354
- 930 VanRheenen, S. M., X. Cao, V. V. Lupashin, C. Barlowe, and M. G. Waters. 1998. Sec35p, a novel peripheral membrane protein, is required for ER to Golgi vesicle docking. *J Cell Biol*. 141:1107-1119.
- 935 VanRheenen, S. M., X. Cao, S. K. Sapperstein, E. C. Chiang, V. V. Lupashin, C. Barlowe, and M. G. Waters. 1999. Sec34p, a protein required for vesicle tethering to the yeast Golgi apparatus, is in a complex with Sec35p. *J Cell Biol*. 147:729-742.
- Vanrheenen, S. M., B. A. Reilly, S. J. Chamberlain, and M. G. Waters. 2001. Dsl1p, an essential protein required for membrane traffic at the endoplasmic reticulum/Golgi interface in yeast. *Traffic*. 2:212-231.
- 940 Verhage, M., A. S. Maia, J. J. Plomp, A. B. Brussaard, J. H. Heeroma, H. Vermeer, R. F. Toonen, R. E. Hammer, T. K. van den Berg, M. Missler, H. J. Geuze, and T. C. Sudhof. 2000. Synaptic assembly of the brain in the absence of neurotransmitter secretion. *Science*. 287:864-869.
- 945 Wu, M. N., J. T. Littleton, M. A. Bhat, A. Prokop, and H. J. Bellen. 1998. ROP, the *Drosophila* Sec1 homolog, interacts with syntaxin and regulates neurotransmitter release in a dosage-dependent manner. *EMBO J*. 17:127-139.
- Xu, H., Y. Jun, J. Thompson, J. Yates, and W. Wickner. 2010. HOPS prevents the disassembly of trans-SNARE complexes by Sec17p/Sec18p during membrane fusion. *EMBO J*. 29:1948-1960.
- 950 Yamaguchi, T., I. Dulubova, S. W. Min, X. Chen, J. Rizo, and T. C. Südhof. 2002. Sly1 binds to Golgi and ER syntaxins via a conserved N-terminal peptide motif. *Dev Cell*. 2:295-305.
- Yu, H., S. S. Rathore, C. Shen, Y. Liu, Y. Ouyang, M. H. Stowell, and J. Shen. 2015. Reconstituting Intracellular Vesicle Fusion Reactions: The Essential Role of Macromolecular Crowding. *J Am Chem Soc*. 137:12873-12883.
- 955 Zucchi, P. C., and M. Zick. 2011. Membrane fusion catalyzed by a Rab, SNAREs, and SNARE chaperones is accompanied by enhanced permeability to small molecules and by lysis. *Mol Biol Cell*. 22:4635-4646.

## SUPPLEMENTARY MATERIAL

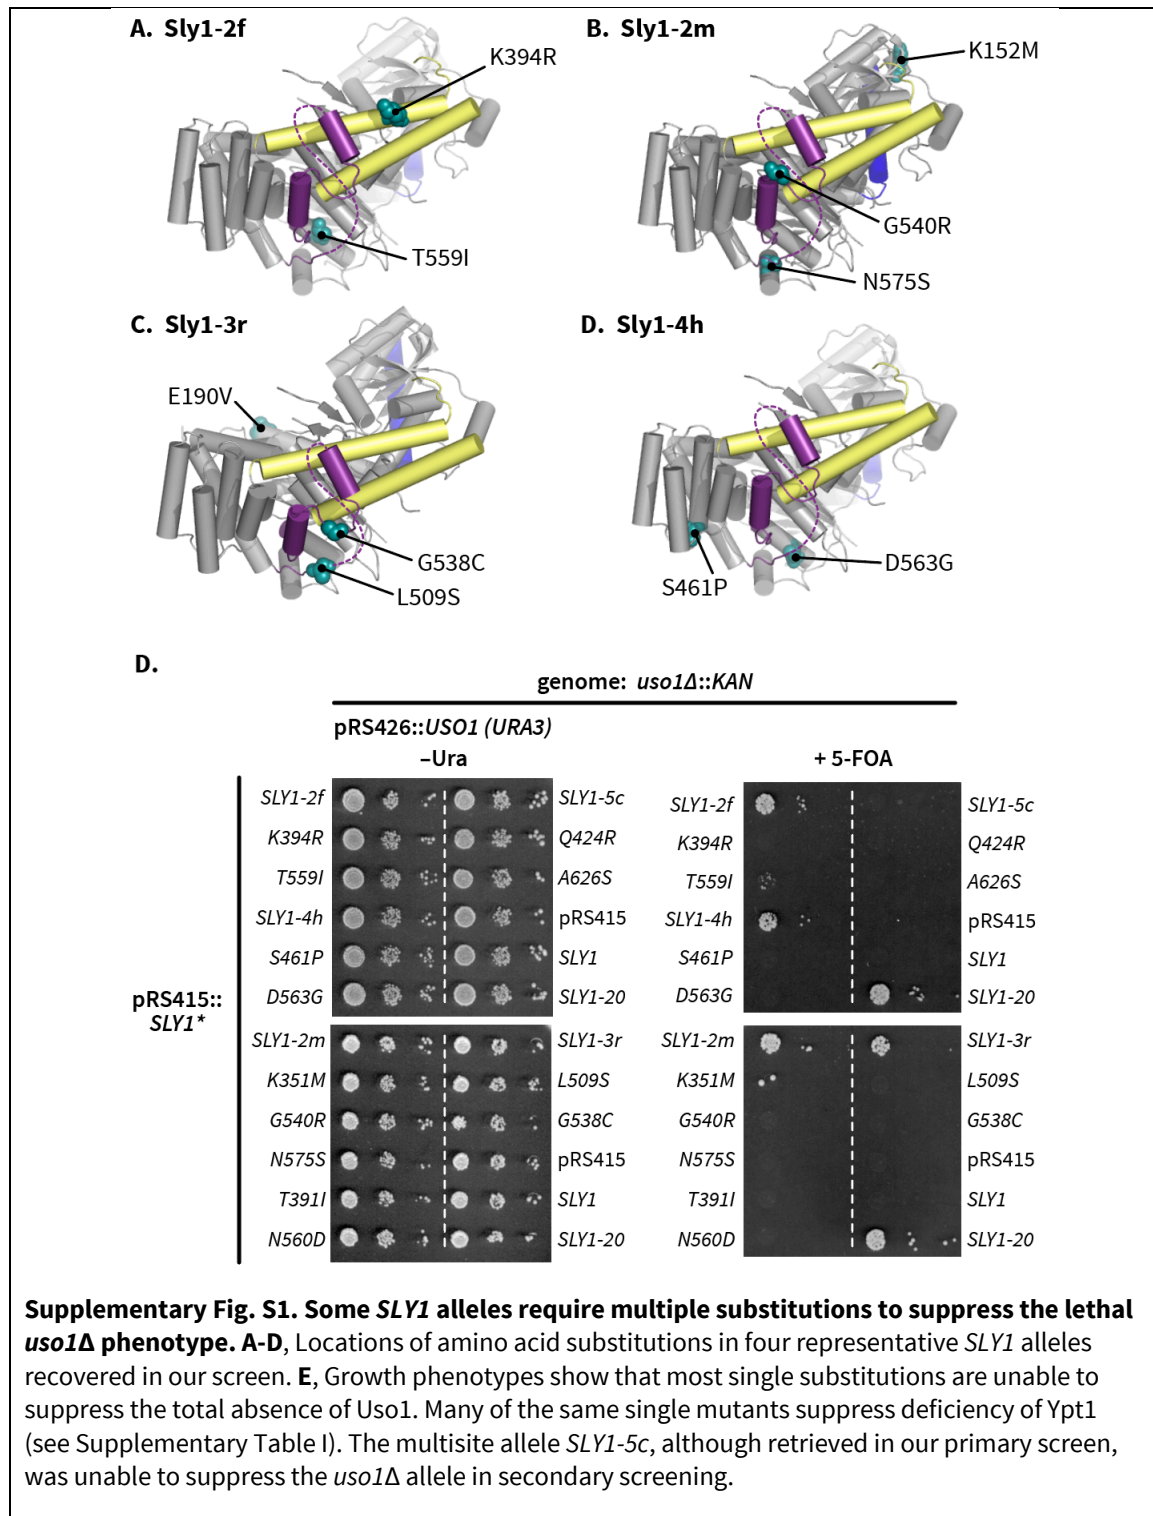



| <b>Supplementary Table 1. Selected <i>SLY1</i> mutants and their growth phenotypes.</b> |                                         |                                             |                                          |                                           |
|-----------------------------------------------------------------------------------------|-----------------------------------------|---------------------------------------------|------------------------------------------|-------------------------------------------|
| <b>Sly1* substitution (protein)</b>                                                     | <b><i>SLY1</i>* allele (nucleotide)</b> | <b>Complements <i>sly1Δ</i><sup>1</sup></b> | <b>Bypasses <i>uso1Δ</i><sup>1</sup></b> | <b>Bypasses <i>ypt1-3</i><sup>2</sup></b> |
| E4D                                                                                     | G12C                                    | ++                                          | -                                        | -                                         |
| V82L                                                                                    | G244C                                   | ++                                          | -                                        | -                                         |
| E190V                                                                                   | A569T                                   | ++                                          | -                                        | -                                         |
| K351M                                                                                   | A1052T                                  | ++                                          | -                                        | -                                         |
| T391I                                                                                   | C1172T                                  | ++                                          | -                                        | -                                         |
| K394R                                                                                   | A1181G                                  | ++                                          | -                                        | -                                         |
| T418I                                                                                   | C1253T                                  | ++                                          | -                                        | -                                         |
| Q424R                                                                                   | A1271G                                  | ++                                          | -                                        | -                                         |
| S461P                                                                                   | T1381C                                  | ++                                          | -                                        | -                                         |
| L509S                                                                                   | T1526C                                  | ++                                          | -                                        | ++                                        |
| T531I = Sly1-15                                                                         | C1592T                                  | ++                                          | ++                                       | ++                                        |
| E532K = Sly1-20                                                                         | G1594A                                  | ++                                          | ++                                       | ++                                        |
| G538C                                                                                   | G1612T                                  | ++                                          | +/-                                      | ++                                        |
| G540R                                                                                   | G1618A                                  | ++                                          | +/-                                      | ++                                        |
| T559I                                                                                   | C1676T                                  | ++                                          | +                                        | ++                                        |
| N560D                                                                                   | A1678G                                  | ++                                          | -                                        | ++                                        |
| D563G                                                                                   | A1688G                                  | ++                                          | +/-                                      | ++                                        |
| N575S                                                                                   | A1724G                                  | ++                                          | -                                        | ++                                        |
| A626S                                                                                   | G1876T                                  | ++                                          | -                                        | -                                         |
| E648A                                                                                   | A1943C                                  | ++                                          | -                                        | -                                         |
| Sly1- $\alpha$ 21<br>L542S I543T I546T<br>L549S L550S                                   | See Materials<br>& Methods              | -                                           | -                                        | -                                         |
| Sly1-20- $\alpha$ 21<br>T531I L542S I543T<br>I546T L549S L550S                          | See Materials<br>& Methods              | ++                                          | -                                        | -                                         |

<sup>1</sup>Growth of *sly1Δ* (or *uso1Δ*) cells, bearing the indicated *SLY1* allele on a *LEU2*-marked plasmid and wild-type *SLY1* (or *USO1*) on a counter-selectable *URA3*-marked balancer plasmid was assessed following ejection of the balancer plasmid on 5-FOA plates incubated at 30°C for 2 days.

<sup>2</sup>Growth of *ypt1-3* cells bearing the indicated alleles of *SLY1* on a *LEU2*-marked plasmid and wild-type YPT1 on a counter-selectable *URA3*-marked balancer plasmid was assessed following ejection of the balancer plasmid on 5-FOA plates incubated at 37°C for 2-3 days.

| <b>Supplementary Table 2. <i>SLY1</i> “loopless” mutants and their growth phenotypes.</b> |                         |                                                                    |                                             |                                          |                                           |
|-------------------------------------------------------------------------------------------|-------------------------|--------------------------------------------------------------------|---------------------------------------------|------------------------------------------|-------------------------------------------|
| <b>Sly1 mutant</b>                                                                        | <b>Residues excised</b> | <b>Synthetic linker (AA/dna)</b>                                   | <b>Complements <i>sly1Δ</i><sup>1</sup></b> | <b>Bypasses <i>uso1Δ</i><sup>1</sup></b> | <b>Bypasses <i>ypt1-3</i><sup>2</sup></b> |
| Sly1 (wt)                                                                                 | –                       | –                                                                  | ++                                          | –                                        | –                                         |
| Sly1-0_1                                                                                  | Δ500-558                | WADKGDGGVT<br>tgggctgataaaggtgatggtggtt                            | +                                           | –                                        | –                                         |
| Sly1-0_2<br>= <b>Sly1Δloop</b>                                                            | Δ500-558                | WAKKGDGGT<br>tgggctaaaaaaggtgatggtggtt                             | +                                           | –                                        | –                                         |
| Sly1-0_3                                                                                  | Δ500-558                | WAKKGDGGV<br>tgggctaaaaaaggtgatggtggtt                             | +                                           | –                                        | –                                         |
| Sly1-0_4                                                                                  | Δ500-558                | WAKKSADGAPT<br>tgggctaaaaatctgctgatggtgctccaact                    | +                                           | –                                        | –                                         |
| Sly1-0_5                                                                                  | Δ500-558                | YAKLSADGAPV<br>tatgctaaattgctgctgatggtgctccagtt                    | +/-                                         | –                                        | –                                         |
| Sly1-0_6                                                                                  | Δ500-558                | WAKAAGDNPT<br>tgggctaaagctgctggtgataatccaact                       | +                                           | –                                        | –                                         |
| Sly1-0_7                                                                                  | Δ500-558                | WAKAAGGTHPT<br>tgggctaaagctgctggtgactatccaact                      | +                                           | –                                        | –                                         |
| Sly1-0_8                                                                                  | Δ500-558                | YAKASSEATGPT<br>tatgctaaagcttcttgaagctactggtccaact                 | +                                           | –                                        | –                                         |
| Sly1-0_9                                                                                  | Δ500-558                | YADQQGTNAGPV<br>tatgctgatcaacaaggtactaatgctggtccagtt               | +                                           | –                                        | –                                         |
| Sly1-0_10                                                                                 | Δ500-558                | YNNAGTGGPT<br>tataataatggtgctggtactggtggtccaact                    | +                                           | –                                        | –                                         |
| Sly1-3_2                                                                                  | Δ497-560                | QEATSKSGGTGPTVA<br>caagaagctacttctaaatctggtgactggtccaactggtgct     | –                                           | –                                        | –                                         |
| Sly1-3_5                                                                                  | Δ497-560                | QQTVDNSGKDAAPTVC<br>caacaaacttatgataattctggtaaagatgctgctccaactggtt | –                                           | –                                        | –                                         |

<sup>1</sup>Growth of *sly1Δ* (or *uso1Δ*) cells, bearing the indicated allele on a *LEU2*-marked plasmid and wild-type *SLY1* (or *USO1*) on a counter-selectable *URA3*-marked balancer plasmid was assessed following ejection of the balancer plasmid on 5-FOA plates incubated at 30°C for 2-3 days.

<sup>2</sup>Growth of *ypt1-3* cells bearing the indicated alleles of *SLY1* on a *LEU2*-marked plasmid and wild-type YPT1 on a counter-selectable *URA3*-marked balancer plasmid was assessed following ejection of the balancer plasmid on 5-FOA plates incubated at 37°C for 2-3 days.

| <b>Supplementary Table 3. <i>SLY1</i> “loopless” chimeras with N-terminal Loop attachments, and their growth phenotypes.</b> |                         |                                                                                                               |                                             |                                          |                                           |
|------------------------------------------------------------------------------------------------------------------------------|-------------------------|---------------------------------------------------------------------------------------------------------------|---------------------------------------------|------------------------------------------|-------------------------------------------|
| <b>Sly1 mutant</b>                                                                                                           | <b>Residues excised</b> | <b>Synthetic linker (AA/dna)</b>                                                                              | <b>Complements <i>sly1Δ</i><sup>1</sup></b> | <b>Bypasses <i>uso1Δ</i><sup>1</sup></b> | <b>Bypasses <i>ypt1-3</i><sup>2</sup></b> |
| Sly1 (wt)                                                                                                                    | –                       | –                                                                                                             | ++                                          | –                                        | –                                         |
| Sly1-0_2<br>= <b>Sly1Δloop</b>                                                                                               | Δ500-558                | WAKKGDGGT<br>tgggctaaaaaaggtgatggtgtact                                                                       | +                                           | –                                        | –                                         |
| loop-Sly1Δloop                                                                                                               | Δ500-558                | Sly1Δloop, with Sly1 aa 502-558-GGSGGSG appended to N-terminus                                                | ++                                          | –                                        | –                                         |
| α20-α21-Sly1Δloop                                                                                                            | Δ500-558                | Sly1Δloop, with Sly1 aa 526-558-GGSGGSG appended to N-terminus                                                | ++                                          | –                                        | –                                         |
| α21-Sly1Δloop                                                                                                                | Δ500-558                | Sly1Δloop, with Sly1 aa 540-558-GGSGGSG appended to N-terminus                                                | ++                                          | –                                        | –                                         |
| loop(pα21)-Sly1Δloop                                                                                                         | Δ500-558                | Sly1Δloop, with Sly1 aa 502-558-GGSGGSG appended to N-terminus; appended sequence contains pα21 substitutions | –                                           | –                                        | –                                         |
| α20-pα21-Sly1Δloop                                                                                                           | Δ500-558                | Sly1Δloop, with Sly1 aa 526-558-GGSGGSG appended to N-terminus; appended sequence contains pα21 substitutions | –                                           | –                                        | –                                         |
| pα21-Sly1Δloop                                                                                                               | Δ500-558                | Sly1Δloop, with Sly1 aa 540-558-GGSGGSG appended to N-terminus; appended sequence contains pα21 substitutions | ++                                          | –                                        | –                                         |

<sup>1</sup>Growth of *sly1Δ* (or *uso1Δ*) cells, bearing the indicated allele on a *LEU2*-marked plasmid and wild-type *SLY1* (or *USO1*) on a counter-selectable *URA3*-marked balancer plasmid was assessed following ejection of the balancer plasmid on 5-FOA plates incubated at 30°C for 3 days.

<sup>2</sup>Growth of *ypt1-3* cells bearing the indicated alleles of *SLY1* on a *LEU2*-marked plasmid, on SC –Leu media shifted to non-permissive temperatures (34° and 37° C) for 3 days.

| <b>Supplementary Table 4. Yeast strains and plasmids used in this study</b> |                                                                                                    |                                         |
|-----------------------------------------------------------------------------|----------------------------------------------------------------------------------------------------|-----------------------------------------|
| <b>Strain/plasmid ID</b>                                                    | <b>Description/genotype</b>                                                                        | <b>Source/reference</b>                 |
| <b>Yeast Strains</b>                                                        |                                                                                                    |                                         |
| AMY2143 (CBY481)                                                            | <i>MATalpha ura3-1 trp1-1 ade2-1 leu2-3,112 can1-100 ypt1-3</i>                                    | C. Barlowe                              |
| AMY2349                                                                     | <i>MATalpha ura3-1 trp1-1 ade2-1 leu2-3,112 can1-100 ypt1-3 CBB1395 (URA3 2μm YPT1)</i>            | C. Barlowe                              |
| AMY2144 (CBY1297)                                                           | <i>MATalpha ura3Δ his3Δ leu2Δ met15Δ lys2Δ uso1Δ::KAN pSK47 (URA3 2μm USO1)</i>                    | C. Barlowe                              |
| AMY2232 (CBY73)                                                             | <i>MATa ura3-52 his3Δ200 trp1Δ63 ade2-101 lys2-801 sly1Δ::HIS3 AMP1525 (URA3 CEN SLY1)</i>         | C. Barlowe                              |
| AMY2141 (Y8205)                                                             | <i>MATalpha ura3Δ0 his3Δ1 leu2Δ0 can1Δ::STE2pr-Sp_his5 lyp1Δ:: STE3pr-LEU2</i>                     | C. Boone                                |
| AMY2440                                                                     | <i>MATalpha ura3Δ0 his3Δ1 leu2Δ0 can1Δ::STE2pr-Sp_his5 lyp1Δ:: STE3pr-LEU2 SLY1-20 (NatMX6)</i>    | This study                              |
| AMY2441                                                                     | <i>MATalpha ura3Δ0 his3Δ1 leu2Δ0 can1Δ::STE2pr-Sp_his5 lyp1Δ:: STE3pr-LEU2 SLY1-T559I (NatMX6)</i> | This study                              |
| AMY2442                                                                     | <i>MATalpha ura3Δ0 his3Δ1 leu2Δ0 can1Δ::STE2pr-Sp_his5 lyp1Δ:: STE3pr-LEU2 SLY1-D563G (NatMX6)</i> | This study                              |
| AMY2443                                                                     | <i>MATalpha ura3Δ0 his3Δ1 leu2Δ0 can1Δ::STE2pr-Sp_his5 lyp1Δ:: STE3pr-LEU2 sly1Δloop (NatMX6)</i>  | This study                              |
| AMY2580                                                                     | <i>MATalpha ura3Δ0 his3Δ1 leu2Δ0 can1Δ::STE2pr-Sp_his5 lyp1Δ:: STE3pr-LEU2 SLY1 WT (NatMX6)</i>    | This study                              |
| <b>Yeast expression plasmids</b>                                            |                                                                                                    |                                         |
| AMP1910                                                                     | pRS415:: <i>SLY1</i>                                                                               | This study                              |
| AMP1578                                                                     | pRS415:: <i>SLY1-20</i>                                                                            | This study                              |
| AMP1588                                                                     | pRS415:: <i>SLY1(T559I)</i>                                                                        | This study                              |
| AMP1589                                                                     | pRS415:: <i>SLY1(D563G)</i>                                                                        | This study                              |
| AMP2052                                                                     | pRS415:: <i>sly1Δloop</i>                                                                          | This study                              |
| AMP1911                                                                     | pRS415:: <i>sly1-pa21</i>                                                                          | This study                              |
| AMP1912                                                                     | pRS415:: <i>sly1-20-pa21</i>                                                                       | This study                              |
| Various                                                                     | pRS415:: <i>SLY1</i> <sup>*1</sup>                                                                 | This study                              |
| pSK47                                                                       | pRS426:: <i>USO1</i>                                                                               | C. Barlowe                              |
| CBB1395                                                                     | pRS426:: <i>YPT1</i>                                                                               | C. Barlowe                              |
| pDN524                                                                      | pRS424 with additional restriction sites flanking 2μ origin                                        | Lobingier et al., 2014                  |
| pDN317                                                                      | pDN524:: <i>SEC17</i>                                                                              | Lobingier et al., 2014                  |
| pDN367                                                                      | pDN524:: <i>sec17-FSMS (F21S, M22S)</i>                                                            | This study                              |
| <b>E. coli SNARE expression plasmids</b>                                    |                                                                                                    |                                         |
| AMP1792                                                                     | pET-30::His <sub>6</sub> -(3C)-Sed5                                                                | (Furukawa and Mima, 2014)               |
| AMP1961                                                                     | pET-30:: His <sub>6</sub> -(3C)-Sed5Habc(22-210)                                                   | This study                              |
| AMP1960                                                                     | pET-30:: His <sub>6</sub> -(3C)-Sed5N-Habc(1-210)                                                  | This study                              |
| AMP1973                                                                     | pET-49::GST- His <sub>6</sub> -(3C)-Sed5cyt(1-319)                                                 | This study                              |
| AMP2020                                                                     | pET-30:: His <sub>6</sub> -(3C)-Bos1(Q153D)                                                        | (Furukawa and Mima, 2014) but modified  |
| AMP1794                                                                     | pET-30:: His <sub>6</sub> -(3C)-Bet1 (with corrected missense mutation)                            | (Furukawa and Mima, 2014) but corrected |
| AMP1795                                                                     | pET-41::GST- His <sub>6</sub> -(3C)-Sec22                                                          | (Furukawa and Mima, 2014)               |
| <b>E. coli SNARE chaperone expression plasmids</b>                          |                                                                                                    |                                         |
| AMP1547                                                                     | pTYB12::intein-CBD-Sec17                                                                           | (Schwartz and Merz, 2009)               |
| AMP77                                                                       | pQE9:: His <sub>6</sub> -SEC18                                                                     | (Haas and Wickner 1996)                 |

| <b><i>E. coli</i> Sly1 expression plasmids</b>                                           |                                                                      |                            |
|------------------------------------------------------------------------------------------|----------------------------------------------------------------------|----------------------------|
| AMP1649 (pBL51)                                                                          | pHIS-Parallel1:: His <sub>6</sub> -(TEV)-Sly1                        | (Lobingier and Merz, 2014) |
| AMP1651                                                                                  | pHIS-Parallel1:: His <sub>6</sub> -(TEV)-Sly1-20                     | This study                 |
| AMP1652                                                                                  | pHIS-Parallel1:: His <sub>6</sub> -(TEV)-Sly1(T559I)                 | This study                 |
| AMP1653                                                                                  | pHIS-Parallel1:: His <sub>6</sub> -(TEV)-Sly1(D563G)                 | This study                 |
| AMP1654                                                                                  | pHIS-Parallel1:: His <sub>6</sub> -(TEV)-Sly1Δloop                   | This study                 |
| AMP1936                                                                                  | pHIS-Parallel1:: His <sub>6</sub> -(TEV)-α20-α21-Sly1Δloop           | This study                 |
| AMP1937                                                                                  | pHIS-Parallel1:: His <sub>6</sub> -(TEV)-α21-Sly1Δloop               | This study                 |
| AMP1939                                                                                  | pHIS-Parallel1:: His <sub>6</sub> -(TEV)-α20-pα21-Sly1Δloop          | This study                 |
| AMP1940                                                                                  | pHIS-Parallel1:: His <sub>6</sub> -(TEV)-pα21-Sly1Δloop              | This study                 |
| AMP1932                                                                                  | pHIS-Parallel1:: His <sub>6</sub> -(TEV)-Sly1-pα21                   | This study                 |
| AMP1933                                                                                  | pHIS-Parallel1:: His <sub>6</sub> -(TEV)-Sly1-20-pα21                | This study                 |
| <b><i>E. coli</i> miscellaneous expression plasmids</b>                                  |                                                                      |                            |
| AMP1881                                                                                  | pET-49::GST- His <sub>6</sub> -(3C)                                  | This study                 |
| AMP2019                                                                                  | pET-30:: His <sub>8</sub> -HRV3C(Protease)                           | This study                 |
| AMP2016                                                                                  | pET-49::GST- His <sub>6</sub> -(Thrombin)-HRV3C(Protease)            | This study                 |
| AMP203                                                                                   | MBP-(TEV)- His <sub>6</sub> -TEV                                     | (Kapust et al., 2002)      |
| AMP2018                                                                                  | pET-28- His <sub>6</sub> -CFP(3C)YFP (for HRV3C protease FRET assay) | This study                 |
| <sup>1</sup> applies to all SLY1 mutants described in supplementary tables S1, S2 and S3 |                                                                      |                            |

970

| <b>Supplementary Table 5. SNARE RPL lipid compositions used in this study</b> |             |                                        |             |
|-------------------------------------------------------------------------------|-------------|----------------------------------------|-------------|
| <b>ER mimetic RPLs (R-SNARE)</b>                                              |             | <b>Golgi mimetic RPLs (Qabc-SNARE)</b> |             |
| <b>Lipid</b>                                                                  | <b>mol%</b> | <b>Lipid</b>                           | <b>mol%</b> |
| 18:1 (Δ9-Cis) PC                                                              | 35.0%       | 18:1 (Δ9-Cis) PC                       | 35.0%       |
| 16:0-18:1 PE                                                                  | 16.0%       | 16:0-18:1 PE                           | 14.0%       |
| Soy PI                                                                        | 6.3%        | Soy PI                                 | 6.3%        |
| 16:0-18:1 PS                                                                  | 5.6%        | 16:0-18:1 PS                           | 5.6%        |
| 16:0-18:1 PA                                                                  | 3.5%        | 16:0-18:1 PA                           | 3.5%        |
| 18:1 CDP DG                                                                   | 1.4%        | 18:1 DG                                | 1.4%        |
| Brain PI(4)P                                                                  | 2.0%        | Brain PI(4)P                           | 2.0%        |
| Ergosterol                                                                    | 30.0%       | Ergosterol                             | 30.0%       |
| 16:0 Marina Blue™ DHPE                                                        | 0.2%        | 16:0 NBD-PE                            | 2.2%        |
